# Supplementary material for: Network pharmacology to unveil the blood components and mechanisms of Tongmai Yangxin Pills in treating elderly coronary heart disease
Source: Front Cardiovasc Med. 2025 Feb 13;12:1475546. doi: 10.3389/fcvm.2025.1475546 (PMC11865046; doi:10.3389/fcvm.2025.1475546)
Supplement: Supplementary file 1 [file Table1.xlsx]

## Sheet: Figure 2B
The GSE142008 profiles shared 918 differentially expressed genes (DEGs), including 679 up-regulated genes, and 239 down-regulated genes.
id	Gene name	logFC	AveExpr	t	P.Value	adj.P.Val	B
219540_at	ZNF267	2.1386	8.26439	6.4799	1.35582e-05	0.00229355	3.47087
224786_at	SCOC	2.132	6.63275	6.19677	2.18762e-05	0.00277709	3.01358
204774_at	EVI2A	2.03949	11.3617	3.74767	0.00211622	0.0237294	-1.40394
204160_s_at	ENPP4	1.99795	7.46389	6.70244	9.38108e-06	0.00216802	3.82159
221193_s_at	ZCCHC10	1.95101	6.34564	7.61308	2.22712e-06	0.00144469	5.17773
224866_at	FAR1	1.93672	9.8692	8.04192	1.17403e-06	0.00121113	5.77364
209795_at	CD69	1.92352	6.11065	4.89283	0.000228248	0.0075277	0.751925
204285_s_at	PMAIP1	1.89967	7.2004	6.1439	2.395e-05	0.00283722	2.92681
223809_at	RGS18	1.88805	12.7653	5.14847	0.000141574	0.00606045	1.21442
232383_at	TFEC	1.8858	6.18008	7.83979	1.58309e-06	0.00136922	5.49609
201745_at	TWF1	1.88574	6.18068	6.61087	1.09073e-05	0.00224194	3.67819
210254_at	MS4A3	1.86744	7.22025	3.99053	0.00130701	0.0182422	-0.938611
201921_at	GNG10	1.85083	13.7566	4.20131	0.000863239	0.0146388	-0.537222
203138_at	HAT1	1.8443	6.76278	4.53488	0.000451483	0.0106356	0.0908152
217915_s_at	RSL24D1	1.84366	7.6822	3.77769	0.00199347	0.0229459	-1.34631
222850_s_at	DNAJB14	1.82198	10.6407	6.84656	7.41702e-06	0.00192341	4.04463
239577_at	RP3-368A4.6	1.81984	6.18974	4.6709	0.000347789	0.00931214	0.343758
235046_at	INPP4B	1.80927	8.53288	3.26943	0.0055047	0.0402743	-2.32178
230141_at	ARID4A	1.80051	8.07278	7.37903	3.18966e-06	0.00155357	4.84114
201238_s_at	CAPZA2	1.78484	12.5497	5.4013	8.90131e-05	0.00493089	1.66312
222805_at	MANEA	1.78339	6.31323	4.153	0.000949025	0.0154299	-0.628953
236193_at	HIST1H2BC	1.76931	7.39785	5.1191	0.000149497	0.00620942	1.16172
201699_at	PSMC6	1.76901	8.69989	4.01833	0.00123717	0.0177866	-0.885514
225612_s_at	B3GNT5	1.76879	8.1019	6.93624	6.41742e-06	0.00181912	4.18181
240592_at	LCORL	1.73814	8.78907	6.68536	9.64781e-06	0.00220709	3.79493
203566_s_at	AGL	1.73496	8.71067	6.8776	7.0537e-06	0.00189573	4.09225
219421_at	TTC33	1.73251	6.16782	5.93185	3.45736e-05	0.00333263	2.57447
203011_at	IMPA1	1.73126	9.49987	6.9797	5.98495e-06	0.00179795	4.24784
226962_at	ZBTB41	1.72795	6.38765	6.40559	1.53557e-05	0.00241952	3.35205
227295_at	IKBIP	1.72546	7.76348	7.43776	2.91283e-06	0.00155357	4.92636
202557_at	HSPA13	1.72101	6.75497	7.7006	1.95068e-06	0.00141559	5.30152
202351_at	ITGAV	1.72092	6.091	5.87457	3.82187e-05	0.00346535	2.47812
226119_at	PCMTD1	1.71236	9.96047	6.04248	2.85253e-05	0.00299351	2.75914
205739_x_at	ZNF107	1.70486	7.71915	7.16086	4.48683e-06	0.00173191	4.51999
218674_at	TRAPPC13	1.69997	5.88923	7.53302	2.51631e-06	0.00151057	5.06351
202422_s_at	ACSL4	1.69909	6.4703	6.4099	1.5245e-05	0.00240902	3.35896
218446_s_at	TVP23B	1.69406	7.22733	4.75342	0.000297172	0.00856503	0.496212
224436_s_at	NIPSNAP3A	1.68764	7.61067	6.3948	1.5637e-05	0.00244972	3.33471
225872_at	SLC35F5	1.6857	7.32749	6.33464	1.73062e-05	0.0025166	3.2378
227701_at	CCDC186	1.68517	7.66218	7.05771	5.28383e-06	0.00177911	4.36565
222657_s_at	UBE2W	1.68416	9.99235	8.77792	4.119e-07	0.000923525	6.736
241342_at	TMEM65	1.68147	7.0561	7.87789	1.49579e-06	0.00134069	5.54885
204748_at	PTGS2	1.67973	9.4149	6.05353	2.79851e-05	0.00297677	2.77749
218351_at	COMMD8	1.67973	8.35328	4.34151	0.000656501	0.0128884	-0.272032
202979_s_at	CREBZF	1.67636	7.67732	4.89529	0.000227192	0.00751921	0.756417
235048_at	FAM169A	1.6746	6.96647	4.2624	0.000765999	0.0138097	-0.421476
228654_at	SPIN4	1.67363	6.23243	6.88907	6.92419e-06	0.00188348	4.10981
218195_at	C6orf211	1.65617	8.76887	7.21644	4.11087e-06	0.00173191	4.60248
217936_at	ARHGAP5	1.65006	6.46117	4.7361	0.000307125	0.00864787	0.464282
227767_at	CSNK1G3	1.64858	7.40008	6.56695	1.17297e-05	0.00224967	3.60897
202859_x_at	CXCL8	1.64764	6.90257	4.18801	0.000886036	0.0148445	-0.562461
225406_at	TWSG1	1.64351	7.23415	5.97071	3.23092e-05	0.00321553	2.63955
226939_at	CPEB2	1.6411	8.92437	5.58108	6.43297e-05	0.00431692	1.97662
227268_at	RNFT1	1.64088	7.78011	5.53289	7.01498e-05	0.00450698	1.89306
204496_at	STRN3	1.63992	7.25728	6.53822	1.23027e-05	0.00224967	3.56352
227428_at	GABPA	1.62184	6.67165	6.07643	2.68993e-05	0.00294315	2.81545
235348_at	ABHD13	1.62027	6.53833	5.45635	8.0549e-05	0.00476235	1.75962
205191_at	RP2	1.61681	10.4521	4.47001	0.00051168	0.0113729	-0.0305033
212887_at	SEC23A	1.60954	9.78197	8.53726	5.7614e-07	0.000971616	6.42948
205140_at	FPGT	1.60739	5.72683	6.54317	1.22021e-05	0.00224967	3.57135
202820_at	AHR	1.60733	6.11448	4.35517	0.000639287	0.0127056	-0.246286
224830_at	NUDT21	1.60193	8.90703	5.47908	7.7303e-05	0.00470662	1.79934
204732_s_at	TRIM23	1.60108	6.77708	6.54128	1.22403e-05	0.00224967	3.56837
206584_at	LY96	1.59872	7.95087	3.39027	0.00432181	0.0351159	-2.09036
218683_at	PTBP2	1.59282	6.82277	5.00404	0.00018524	0.00672508	0.954167
222201_s_at	CASP8AP2	1.58238	8.04695	4.33498	0.000664895	0.0129591	-0.284343
225519_at	PPP4R2	1.57509	10.457	6.56487	1.17703e-05	0.00224967	3.60568
239482_x_at	ZNF708	1.57164	5.80079	7.58851	2.31193e-06	0.00146982	5.14279
223239_at	GSKIP	1.5716	9.09161	6.15972	2.33087e-05	0.00281325	2.95282
218197_s_at	OXR1	1.5693	8.34781	7.85047	1.55808e-06	0.00136922	5.51091
219313_at	GRAMD1C	1.56705	5.99445	5.09502	0.000156334	0.00631956	1.11843
226366_at	SHPRH	1.56376	7.26139	4.66752	0.00035004	0.00931764	0.337505
209780_at	PHTF2	1.5611	8.93024	5.34055	9.94357e-05	0.00517066	1.55613
225334_at	C10orf32	1.55777	8.19129	6.08407	2.65472e-05	0.0029382	2.82809
227101_at	ZNF800	1.5482	9.24702	7.79813	1.68476e-06	0.00137484	5.43815
1558956_s_at	IFT80	1.548	7.05521	3.67077	0.00246675	0.0256846	-1.55164
202971_s_at	DYRK2	1.54331	10.9936	4.57066	0.00042145	0.0102412	0.157541
224996_at	ASPH	1.54186	7.016	7.00537	5.744e-06	0.00177911	4.28671
226321_at	LYSMD3	1.54091	8.81438	6.46034	1.4009e-05	0.00229739	3.43967
213372_at	PAQR3	1.54067	5.93125	5.09472	0.00015642	0.00631956	1.1179
226894_at	SLC35A3	1.53729	7.37095	5.19218	0.00013058	0.00581391	1.29264
226350_at	CHML	1.53663	5.7239	5.85913	3.92687e-05	0.00352548	2.45205
203584_at	EMC2	1.53066	6.27246	4.44775	0.000534195	0.0116143	-0.0722398
202769_at	CCNG2	1.52953	13.0965	6.11796	2.50419e-05	0.00287037	2.88407
201603_at	PPP1R12A	1.52752	12.2487	7.1502	4.56298e-06	0.00174462	4.50412
218458_at	GMCL1	1.52703	9.83589	8.42767	6.72739e-07	0.000971616	6.28731
201304_at	NDUFA5	1.52577	7.68582	4.49441	0.000488122	0.0111154	0.0151817
225040_s_at	RPE	1.52265	6.8754	5.66949	5.49227e-05	0.00396203	2.12904
226003_at	KIF21A	1.52256	6.26757	5.3448	9.86668e-05	0.00516415	1.56363
223716_s_at	ZRANB2	1.51949	11.1936	4.03492	0.00119733	0.0175038	-0.853856
222849_s_at	SCRN3	1.51765	5.44929	4.74184	0.000303787	0.00861385	0.474873
202635_s_at	POLR2K	1.51382	6.38678	3.35152	0.0046705	0.0366843	-2.16466
1560306_at	RP11-68I3.11	1.51033	7.11328	4.60884	0.000391657	0.00986372	0.228609
213168_at	SP3	1.50972	13.0042	6.83631	7.54128e-06	0.00192341	4.02887
226472_at	PPIL4	1.50755	6.485	5.48434	7.65712e-05	0.00467769	1.80852
1555888_at	KB-431C1.4	1.50434	8.23131	4.43126	0.000551519	0.0117534	-0.103173
222071_s_at	SLCO4C1	1.50143	8.15948	6.20239	2.16675e-05	0.00277457	3.02276
218589_at	LPAR6	1.50098	9.18572	5.83525	4.0952e-05	0.00357105	2.41168
203651_at	ZFYVE16	1.50049	8.89343	5.61898	6.01057e-05	0.00411299	2.04212
222103_at	ATF1	1.50029	9.40746	5.39623	8.9837e-05	0.00493582	1.65422
222825_at	OTUD6B	1.49998	5.31202	5.0006	0.000186433	0.00675049	0.947947
228324_at	C9orf41	1.49824	6.59849	4.99099	0.000189819	0.00682339	0.930514
221510_s_at	GLS	1.49423	11.4671	3.71399	0.0022631	0.0245799	-1.46863
218352_at	RCBTB1	1.49371	7.81644	5.40966	8.76707e-05	0.00490344	1.6778
204995_at	CDK5R1	1.49306	5.95217	5.34199	9.91744e-05	0.00516415	1.55867
225997_at	MOB1B	1.49293	8.55423	6.54109	1.22443e-05	0.00224967	3.56806
225290_at	ETNK1	1.49285	10.1602	5.42072	8.59258e-05	0.004873	1.69722
217826_s_at	UBE2J1	1.49149	11.4608	7.4557	2.8334e-06	0.00154916	4.95229
228087_at	CCDC126	1.49077	7.49491	9.40367	1.77345e-07	0.000858942	7.49755
212989_at	SGMS1	1.48957	7.63512	7.40089	3.08352e-06	0.00155357	4.87292
218940_at	VCPKMT	1.48692	8.38338	4.48121	0.000500723	0.0112616	-0.00952308
223418_x_at	ANKRD13C	1.48411	6.64088	4.58647	0.00040884	0.0101055	0.186988
236841_at	LOC100134445	1.4821	9.3029	3.58627	0.00292007	0.0283108	-1.71401
202033_s_at	RB1CC1	1.48158	9.97804	5.88484	3.75367e-05	0.00343552	2.49543
228149_at	C7orf60	1.47978	8.67687	7.52999	2.52801e-06	0.00151057	5.05917
209662_at	CETN3	1.47815	4.61866	4.26865	0.0007567	0.0137405	-0.409644
228222_at	PPP1CB	1.47041	11.9512	8.43494	6.65829e-07	0.000971616	6.29679
212731_at	ANKRD46	1.46468	6.6882	9.09574	2.67069e-07	0.000858942	7.12906
1554154_at	GDAP2	1.46381	7.89544	6.46679	1.38586e-05	0.00229739	3.44996
208731_at	RAB2A	1.46354	10.0539	8.64157	4.97752e-07	0.000958164	6.56329
222685_at	HAUS6	1.46021	5.74262	4.80771	0.000268079	0.00814272	0.596064
213262_at	SACS	1.46007	5.85734	4.13056	0.000991798	0.0158141	-0.671627
226290_at	BDP1	1.45444	7.82808	5.16403	0.000137555	0.00598495	1.24229
209566_at	INSIG2	1.45119	6.78185	5.83993	4.06165e-05	0.00355969	2.41959
226537_at	HINT3	1.45034	5.03578	6.5282	1.25095e-05	0.0022595	3.54764
202467_s_at	COPS2	1.45003	8.923	3.57616	0.00297971	0.0286219	-1.73345
212984_at	ATF2	1.44973	9.90325	5.58545	6.38265e-05	0.00429239	1.98419
235615_at	PGGT1B	1.44758	7.98062	6.04851	2.8229e-05	0.00297957	2.76916
225769_at	COG6	1.44476	7.28603	4.41482	0.000569373	0.011974	-0.13405
222209_s_at	TMEM135	1.44402	6.38649	5.47989	7.71897e-05	0.00470662	1.80075
238778_at	MPP7	1.44276	7.33081	6.52761	1.25218e-05	0.0022595	3.5467
225885_at	EEA1	1.43955	7.69633	7.74141	1.83437e-06	0.0014126	5.35886
219819_s_at	MRPS28	1.43622	5.92966	4.79754	0.000273292	0.00819197	0.577399
231929_at	IKZF2	1.43571	6.89954	3.3487	0.00469695	0.0367916	-2.17006
213019_at	RANBP6	1.43228	6.8768	4.90961	0.000221148	0.0074134	0.782542
226680_at	IKZF5	1.43168	8.1097	5.37432	9.34927e-05	0.00505489	1.61568
225760_at	MYSM1	1.4247	9.34188	4.84205	0.000251208	0.00789812	0.659051
227031_at	SNX13	1.42414	8.27227	7.19112	4.27781e-06	0.00173191	4.56497
218545_at	CCDC91	1.42327	6.60446	4.2882	0.000728369	0.0135133	-0.37268
209628_at	NXT2	1.42262	7.52563	7.99808	1.25214e-06	0.00126779	5.71394
230836_at	ST8SIA4	1.42258	12.418	4.08427	0.00108634	0.0165771	-0.759744
205003_at	DOCK4	1.42062	6.92287	4.75803	0.000294579	0.00852739	0.504705
241731_x_at	ZNF440	1.41855	5.04679	7.10794	4.87858e-06	0.00177911	4.44101
218303_x_at	KRCC1	1.4185	9.24819	5.72593	4.96779e-05	0.00384615	2.22574
222580_at	ZNF644	1.41523	8.24286	5.21367	0.000125505	0.00572833	1.33099
227636_at	THAP5	1.41432	8.14257	5.97009	3.23441e-05	0.00321553	2.63851
1562777_at	ERV3-1	1.41407	5.86491	5.51699	7.21891e-05	0.00455511	1.86541
213701_at	C12orf29	1.41405	7.25035	5.09762	0.000155581	0.0063104	1.12311
218738_s_at	RNF138	1.41188	10.5338	6.63168	1.05389e-05	0.00222056	3.7109
212544_at	ZNHIT3	1.40958	6.7662	4.32139	0.000682726	0.0130976	-0.309984
219283_at	C1GALT1C1	1.40868	7.80772	5.92523	3.49757e-05	0.00334422	2.56336
203132_at	RB1	1.40807	8.64679	6.61959	1.07513e-05	0.00222056	3.69191
229618_at	SNX16	1.40524	5.96213	5.25266	0.000116812	0.00553531	1.40041
223320_s_at	ABCB10	1.40508	8.35316	7.00233	5.77203e-06	0.00177911	4.28211
212530_at	NEK7	1.40295	13.6344	4.99061	0.000189954	0.00682373	0.92983
226337_at	GORAB	1.39787	5.72318	4.71727	0.000318337	0.00884275	0.429527
236539_at	PTPN22	1.39592	8.52454	4.5043	0.000478899	0.0110201	0.0336714
225585_at	RAP2A	1.39484	9.91126	6.25012	1.99738e-05	0.00267887	3.10068
206613_s_at	TAF1A	1.39269	4.51197	5.18948	0.000131235	0.00583354	1.2878
208716_s_at	TMCO1	1.39223	9.7791	3.60459	0.00281513	0.0276929	-1.6788
219487_at	BBS10	1.39067	6.0206	6.84703	7.41143e-06	0.00192341	4.04535
221645_s_at	ZNF83	1.38978	7.19525	3.16221	0.00682179	0.0453859	-2.52636
213387_at	ATAD2B	1.38758	7.38816	4.7182	0.000317774	0.00883288	0.431245
209585_s_at	MINPP1	1.38376	6.2056	5.74745	4.78178e-05	0.00381074	2.26249
228026_at	SIKE1	1.38106	7.75639	6.07685	2.688e-05	0.00294315	2.81614
203789_s_at	SEMA3C	1.37901	5.34736	7.20775	4.16734e-06	0.00173191	4.58962
208808_s_at	HMGB2	1.37575	12.0162	4.29857	0.000713777	0.0133429	-0.353074
202763_at	CASP3	1.37574	8.49765	5.33765	9.99637e-05	0.0051754	1.55101
226866_at	ESCO1	1.37573	8.79835	6.74673	8.72508e-06	0.00208316	3.89047
212368_at	ZNF292	1.37343	8.85361	5.02264	0.000178908	0.00660486	0.987847
213761_at	MDM1	1.3719	8.3846	4.92955	0.000213008	0.00727314	0.818873
214751_at	ZNF468	1.36886	7.33936	5.6646	5.54028e-05	0.00396346	2.12066
227265_at	FGL2	1.36712	17.3356	4.84322	0.000250654	0.00788733	0.661193
206098_at	ZBTB6	1.3658	5.8464	5.71467	5.06803e-05	0.00386328	2.2065
226109_at	C21orf91	1.36396	10.5198	6.50201	1.30672e-05	0.00228258	3.50605
235170_at	ZNF92	1.36304	7.19646	5.76774	4.6131e-05	0.0037489	2.29707
218499_at	MST4	1.36147	11.563	6.37916	1.60538e-05	0.00248481	3.30958
218640_s_at	PLEKHF2	1.36001	11.205	7.82114	1.62779e-06	0.00136922	5.47018
218247_s_at	MEX3C	1.35999	9.84692	5.47275	7.81933e-05	0.00474497	1.78828
208374_s_at	CAPZA1	1.35738	15.6949	7.09166	5.00627e-06	0.00177911	4.41661
219644_at	CEP83	1.35521	5.03467	5.20055	0.000128578	0.0057908	1.30758
225227_at	SKIL	1.35451	8.69893	6.20179	2.16896e-05	0.00277457	3.02178
203253_s_at	PPIP5K2	1.3538	9.60834	6.52269	1.26248e-05	0.00226315	3.53889
221760_at	MAN1A1	1.35243	11.4371	4.90342	0.000223741	0.00746294	0.771248
225835_at	SLC12A2	1.35077	5.54554	5.76929	4.60046e-05	0.00374859	2.29971
202266_at	TDP2	1.35	12.616	6.79651	8.04501e-06	0.00200755	3.96752
213743_at	CCNT2	1.34988	8.48612	4.93209	0.000211994	0.00725786	0.823494
226181_at	TUBE1	1.34894	5.51926	4.73795	0.000306048	0.00863424	0.467687
1553113_s_at	CDK8	1.34853	6.40318	6.32987	1.74463e-05	0.0025166	3.23009
200056_s_at	C1D	1.34834	9.74476	6.57573	1.15603e-05	0.00224967	3.62282
226261_at	ZNRF2	1.34609	6.33469	6.52041	1.26726e-05	0.0022643	3.53529
1552773_at	CLEC4D	1.3459	6.63945	5.05851	0.000167328	0.00646548	1.05264
209187_at	DR1	1.34556	11.4788	5.5055	7.37005e-05	0.00459997	1.84541
211758_x_at	TXNDC9	1.34534	7.98117	5.66998	5.4874e-05	0.00396203	2.1299
219023_at	AP1AR	1.34424	5.52201	5.44332	8.24736e-05	0.00477613	1.73682
221935_s_at	EOGT	1.34417	4.98511	4.30841	0.000700218	0.0132472	-0.334494
212410_at	MICU2	1.34406	10.9875	5.35457	9.69215e-05	0.00514484	1.58088
221230_s_at	ARID4B	1.34255	11.608	5.08461	0.00015939	0.00635498	1.09969
225297_at	HAUS1	1.33805	6.23822	4.79971	0.000272172	0.0081802	0.581381
226339_at	TRUB1	1.33529	6.34265	5.71666	5.05018e-05	0.00386179	2.2099
227471_at	HACE1	1.33508	6.17099	5.97064	3.23131e-05	0.00321553	2.63943
226106_at	RNF141	1.33345	11.5997	4.84556	0.000249547	0.00787759	0.665482
202413_s_at	USP1	1.33297	11.0071	5.66407	5.54558e-05	0.00396346	2.11973
223620_at	GPR34	1.33186	6.14941	4.34684	0.000649733	0.0128154	-0.261991
222870_s_at	B3GNT2	1.33135	9.18833	4.81604	0.000263881	0.00808275	0.611358
212634_at	UFL1	1.33123	8.57101	4.87803	0.000234707	0.00764433	0.724888
235117_at	CHAC2	1.33102	4.83077	4.18845	0.000885272	0.0148445	-0.561627
225676_s_at	DCAF13	1.33024	7.07617	3.20575	0.00625286	0.0432753	-2.44339
222691_at	SLC35B3	1.32992	8.16471	6.31885	1.77747e-05	0.00253082	3.21226
218911_at	YEATS4	1.32951	5.09709	5.48917	7.59069e-05	0.00466327	1.81693
212893_at	ZZZ3	1.32806	7.67385	4.5671	0.000424343	0.010275	0.15091
227003_at	RAB28	1.32625	8.71997	7.28399	3.69804e-06	0.00166642	4.70212
228242_at	N4BP2	1.32302	5.93342	4.55345	0.000435626	0.0104464	0.125473
213106_at	ATP8A1	1.32219	9.51105	4.87011	0.000238241	0.00771216	0.710407
206652_at	ZMYM5	1.32207	6.54972	4.50706	0.000476349	0.010984	0.0388467
212289_at	ANKRD12	1.32063	9.48743	4.83738	0.000253434	0.00792252	0.650505
226779_at	LMBRD2	1.31902	8.84772	5.31329	0.000104517	0.00527167	1.50795
243332_at	RP11-124L9.5	1.31849	6.83913	3.15298	0.00694887	0.0458398	-2.54393
223204_at	FAM198B	1.3184	9.92011	4.60235	0.000396564	0.0099278	0.216539
212982_at	ZDHHC17	1.31836	10.1968	4.63699	0.000371091	0.0096204	0.280895
203362_s_at	MAD2L1	1.31811	5.20742	5.35118	9.75242e-05	0.00514768	1.57489
204112_s_at	HNMT	1.31694	8.00333	4.3888	0.000598849	0.0123111	-0.182965
213320_at	PRMT3	1.31669	6.57406	5.78582	4.46802e-05	0.0036846	2.32783
226338_at	TMEM55A	1.31565	9.34212	4.66661	0.000350652	0.00932485	0.335812
207606_s_at	ARHGAP12	1.31464	6.01175	3.69704	0.00234088	0.0249534	-1.50119
222623_s_at	ZNF639	1.31344	8.55647	6.41308	1.51637e-05	0.00240784	3.36407
235230_at	PLCXD2	1.3128	5.97661	4.3239	0.000679406	0.0130723	-0.305261
209681_at	SLC19A2	1.31156	5.47396	5.41276	8.71769e-05	0.00489866	1.68326
226344_at	ZMAT1	1.31077	5.75358	3.48217	0.00359573	0.0316778	-1.91399
219166_at	DNAAF2	1.30921	6.81262	5.44408	8.23598e-05	0.00477613	1.73816
213355_at	ST3GAL6	1.30733	6.53248	4.52803	0.000457481	0.0107346	0.0780216
226851_at	LYPLAL1	1.30355	8.8357	6.83164	7.59866e-06	0.00192341	4.02168
213376_at	ZBTB1	1.30327	9.6845	3.86251	0.00168423	0.0210979	-1.18363
220235_s_at	LRIF1	1.30225	8.45873	5.79122	4.42565e-05	0.00367739	2.33701
228961_at	MIER3	1.30219	6.16	5.67775	5.41204e-05	0.00394971	2.14323
224747_at	UBE2Q2	1.30155	9.36469	5.36232	9.55614e-05	0.00509333	1.59453
226630_at	MIS18BP1	1.30109	8.37024	6.29261	1.85828e-05	0.00256326	3.16975
206875_s_at	SLK	1.30045	10.0444	4.85419	0.000245512	0.00780755	0.681279
231870_s_at	NMD3	1.30003	7.93318	5.09653	0.000155896	0.00631846	1.12115
203819_s_at	IGF2BP3	1.29936	5.42524	5.43948	8.30493e-05	0.00479485	1.7301
217971_at	LAMTOR3	1.29783	9.28621	3.86665	0.00167047	0.0210106	-1.17571
226521_s_at	FAM175A	1.29697	5.90697	7.53647	2.50307e-06	0.00151057	5.06845
227012_at	SLC25A40	1.29688	9.53087	5.93297	3.45061e-05	0.00333263	2.57635
229460_at	FAM126B	1.29637	12.6552	4.99855	0.000187152	0.00676626	0.944221
214723_x_at	ANKRD36	1.29599	5.29236	4.26805	0.000757594	0.0137476	-0.410789
226297_at	HIPK3	1.29499	15.458	7.37476	3.21086e-06	0.00155357	4.83492
225448_at	NAPG	1.29423	7.37489	5.60974	6.11084e-05	0.00416596	2.02616
227934_at	KPNA5	1.29281	8.06705	4.08314	0.00108878	0.0165991	-0.761911
201664_at	SMC4	1.29266	9.13689	4.08606	0.00108253	0.0165446	-0.756346
227239_at	FAM126A	1.29261	8.84138	5.38366	9.19163e-05	0.00499971	1.63211
210117_at	SPAG1	1.29224	5.82369	3.21537	0.00613363	0.0427096	-2.42503
224308_s_at	INTS2	1.29179	5.76254	4.30392	0.000706374	0.0133035	-0.342974
213239_at	PIBF1	1.29114	4.50646	4.64732	0.000363827	0.00951327	0.300059
228999_at	CHD2	1.29077	9.58344	4.00824	0.00126209	0.0179071	-0.904794
1556744_a_at	ZNF654	1.28832	7.96679	3.52358	0.00330996	0.0302528	-1.83447
228135_at	C1orf52	1.28832	9.90951	5.29953	0.000107185	0.00531572	1.48359
223268_at	C11orf54	1.28698	8.72586	6.33416	1.73202e-05	0.0025166	3.23703
224740_at	SMIM15	1.28666	9.17651	4.82453	0.000259674	0.00800042	0.626936
223261_at	POLK	1.28491	8.00925	7.80524	1.66692e-06	0.00137484	5.44806
201873_s_at	ABCE1	1.2835	7.59461	4.57921	0.00041458	0.0101783	0.173473
209369_at	ANXA3	1.28347	8.65354	4.21463	0.000841014	0.0144674	-0.511963
205664_at	KIN	1.27942	6.75676	4.86701	0.000239639	0.00772335	0.704737
202651_at	LPGAT1	1.27929	11.4314	8.09968	1.07888e-06	0.00121113	5.8519
224826_at	GPCPD1	1.27853	9.40864	5.02266	0.0001789	0.00660486	0.987888
229584_at	LRRK2	1.27598	12.1149	5.04323	0.000172162	0.00653414	1.02506
204342_at	SLC25A24	1.27581	11.0579	6.56981	1.16743e-05	0.00224967	3.61348
206618_at	IL18R1	1.27546	7.30159	5.19537	0.000129814	0.00580256	1.29834
224759_s_at	TMEM263	1.26759	8.40497	3.8238	0.00181885	0.021909	-1.25786
213251_at	SMARCA5	1.26745	9.40693	4.73521	0.000307645	0.00865252	0.462641
228191_at	FLVCR1	1.26544	8.89412	3.58511	0.00292688	0.0283279	-1.71625
209451_at	TANK	1.2654	11.9924	6.17362	2.27603e-05	0.00279109	2.97563
218432_at	FBXO3	1.26517	7.81451	4.38273	0.000605949	0.0123666	-0.194386
204634_at	NEK4	1.26334	7.10645	4.57563	0.00041744	0.0102027	0.166809
226753_at	FAM76B	1.26305	8.38366	4.09028	0.00107358	0.0164836	-0.748309
218135_at	ERGIC2	1.26108	9.17654	4.27131	0.000752776	0.0137193	-0.404608
238983_at	NSUN7	1.25711	6.10876	5.17885	0.000133835	0.00590593	1.26882
203791_at	DMXL1	1.25613	7.84411	4.60724	0.000392861	0.00986883	0.225635
228174_at	SCAI	1.25528	5.96596	4.26969	0.000755173	0.013731	-0.407688
211764_s_at	UBE2D1	1.25452	13.4687	3.78837	0.00195159	0.0226883	-1.32583
202983_at	HLTF	1.25415	7.31492	4.33856	0.000660279	0.0129327	-0.277592
224412_s_at	TRPM6	1.25125	7.0476	4.14197	0.000969814	0.0155984	-0.64993
203593_at	CD2AP	1.25033	7.14293	4.16857	0.00092046	0.0151448	-0.599366
226505_x_at	USP32	1.25024	10.4702	5.33712	0.00010006	0.0051754	1.55008
202653_s_at	MARCH7	1.249	12.4014	6.03467	2.89135e-05	0.00302754	2.74617
227105_at	CSPP1	1.24873	6.42444	4.28775	0.000729009	0.0135205	-0.373531
212698_s_at	SEPT10	1.24747	4.79337	3.6988	0.00233268	0.0249198	-1.49781
226785_at	ATP11C	1.24678	8.05023	4.84907	0.000247898	0.00784485	0.671907
204523_at	ZNF140	1.24619	7.15631	5.08403	0.00015956	0.00635498	1.09866
225971_at	DDHD1	1.24577	7.73712	4.578	0.000415541	0.0101849	0.171228
201661_s_at	ACSL3	1.24444	8.5395	7.00436	5.75329e-06	0.00177911	4.28518
227803_at	ENPP5	1.24377	4.98154	4.18991	0.000882746	0.0148445	-0.558859
223444_at	SENP7	1.24342	7.53381	4.77684	0.000284238	0.00833649	0.539338
225411_at	TMEM87B	1.24317	7.82888	4.21467	0.000840948	0.0144674	-0.511887
226510_at	HEATR5A	1.24269	8.42904	4.74395	0.000302572	0.00859383	0.478758
234997_x_at	RP11-488L18.10	1.24188	9.15622	4.08178	0.00109169	0.0166216	-0.764495
230403_at	RFX3	1.24152	6.46417	5.37986	9.25541e-05	0.00502023	1.62543
201486_at	RCN2	1.24077	8.42532	6.51507	1.27858e-05	0.00226565	3.52681
226951_at	C2orf49	1.23992	8.08082	3.773	0.00201216	0.0231027	-1.35531
225501_at	PHF6	1.23955	8.01412	5.22489	0.000122937	0.0056866	1.35099
211423_s_at	SC5D	1.23905	6.2477	4.83853	0.000252884	0.00791753	0.65261
213878_at	PYROXD1	1.23874	9.14608	4.92084	0.000216525	0.00733944	0.803008
202950_at	CRYZ	1.23689	6.89031	3.27534	0.00543997	0.0400203	-2.31048
225497_at	ATE1	1.23645	8.02014	5.78291	4.49109e-05	0.00368694	2.32288
208783_s_at	CD46	1.23475	15.6651	5.08576	0.000159049	0.00635498	1.10177
203302_at	DCK	1.23424	10.1639	4.45049	0.000531369	0.011596	-0.0670986
225243_s_at	SLMAP	1.23371	8.74366	8.48481	6.20401e-07	0.000971616	6.36164
201761_at	MTHFD2	1.23315	9.11973	8.07716	1.11498e-06	0.00121113	5.82143
213805_at	ABHD5	1.23298	9.89235	5.37256	9.37946e-05	0.00505489	1.61257
212158_at	SDC2	1.23208	5.9715	4.37004	0.00062108	0.0125202	-0.218287
225127_at	TMEM181	1.23106	10.1988	5.15904	0.00013883	0.00599571	1.23336
220992_s_at	TRMT1L	1.2307	7.52756	5.53155	7.03196e-05	0.00450729	1.89073
218842_at	RPAP3	1.2296	8.76589	5.638	5.8097e-05	0.0040653	2.07489
203284_s_at	HS2ST1	1.22846	7.33747	7.72922	1.86832e-06	0.00141559	5.34177
202502_at	ACADM	1.22725	8.9454	6.55462	1.19722e-05	0.00224967	3.58947
227038_at	SGMS2	1.22708	7.64709	5.6274	5.92079e-05	0.00408736	2.05663
244743_x_at	ZNF138	1.22679	5.53833	6.66468	9.98131e-06	0.00220901	3.76261
201955_at	CCNC	1.22636	9.19501	4.97269	0.000196437	0.00696854	0.897322
235767_x_at	PHAX	1.22455	7.84542	5.63926	5.7966e-05	0.00406319	2.07706
1553311_at	C20orf197	1.22438	4.61738	5.1085	0.000152467	0.00626779	1.14268
212900_at	SEC24A	1.22432	9.09422	5.11894	0.000149541	0.00620942	1.16143
228201_at	ARL13B	1.22387	5.58795	3.95154	0.00141179	0.0190122	-1.01316
235346_at	FUNDC1	1.22309	6.3256	3.91749	0.00151027	0.0198398	-1.07832
203983_at	TSNAX	1.22256	9.62997	5.7872	4.45713e-05	0.0036846	2.33018
221918_at	CDK17	1.22232	11.1437	5.69965	5.20517e-05	0.00390388	2.18078
200934_at	DEK	1.22139	11.8045	4.49965	0.00048321	0.0110439	0.0249866
227255_at	PDIK1L	1.22127	5.7618	4.30966	0.000698511	0.0132279	-0.332129
210054_at	HAUS3	1.21974	6.59016	4.79181	0.000276279	0.00820954	0.566864
217739_s_at	NAMPT	1.21964	18.3627	3.87674	0.00163733	0.0207947	-1.15635
232629_at	PROK2	1.21941	15.6007	3.93691	0.00145328	0.0193847	-1.04115
227861_at	TMEM161B	1.21772	8.3068	4.4431	0.000539025	0.0116487	-0.0809636
224206_x_at	MYNN	1.21712	6.70925	4.00244	0.00127661	0.0180195	-0.915861
225578_at	MZT1	1.21638	6.80162	5.91995	3.52997e-05	0.00335654	2.5545
225919_s_at	C9orf72	1.21613	10.5497	4.34314	0.000654419	0.0128706	-0.268954
209989_at	ZNF268	1.21561	5.68031	4.12553	0.00100166	0.0159064	-0.681203
224797_at	ARRDC3	1.21504	12.4598	4.04779	0.00116733	0.0172636	-0.829305
215245_x_at	FMR1	1.21405	11.6493	4.65462	0.000358783	0.00942927	0.313591
228220_at	FCHO2	1.21378	9.76883	4.50169	0.000481314	0.0110339	0.0287963
218268_at	TBC1D15	1.21364	8.72055	5.72388	4.98589e-05	0.00384615	2.22224
225974_at	TMEM64	1.21359	9.41548	6.56678	1.17331e-05	0.00224967	3.6087
51228_at	RBM12B	1.21357	6.76622	5.29926	0.000107238	0.00531572	1.48311
228468_at	MASTL	1.21248	4.54459	3.76213	0.00205618	0.0233725	-1.37619
227162_at	ZBTB26	1.21233	6.36819	4.0209	0.00123091	0.0177487	-0.880604
225658_at	SPOPL	1.21157	11.7512	7.04513	5.3908e-06	0.00177911	4.34671
225302_at	TMX3	1.21118	9.6517	5.41734	8.64547e-05	0.004878	1.69129
203525_s_at	APC	1.21031	8.53189	6.63206	1.05323e-05	0.00222056	3.71149
212855_at	DCUN1D4	1.20991	6.22967	6.29379	1.85456e-05	0.00256326	3.17166
218929_at	CDKN2AIP	1.20947	8.27306	4.86762	0.000239362	0.00772101	0.70586
200833_s_at	RAP1B	1.20809	17.2051	5.08453	0.000159414	0.00635498	1.09955
217544_at	MIR3916	1.20767	5.74553	3.54621	0.00316348	0.0295714	-1.79098
223071_at	IER3IP1	1.2073	8.21975	5.02795	0.000177143	0.00659312	0.997449
227801_at	TRIM59	1.20692	6.98821	3.91648	0.00151329	0.0198606	-1.08025
219157_at	KLHL2	1.2067	11.8984	4.70288	0.000327191	0.00899858	0.402936
229551_x_at	ZNF367	1.20631	5.87715	4.5781	0.000415465	0.0101849	0.171407
218877_s_at	TRMT11	1.20583	6.34802	3.55598	0.00310234	0.0292664	-1.77222
230298_at	MBLAC2	1.20444	6.94469	4.45224	0.00052957	0.0115771	-0.0638127
225421_at	PM20D2	1.20232	8.24857	4.11058	0.00103152	0.0161553	-0.709636
203688_at	PKD2	1.202	6.63599	4.08471	0.00108542	0.0165676	-0.758921
209272_at	NAB1	1.20121	8.36544	6.23526	2.04854e-05	0.00272373	3.07647
227929_at	LIN7A	1.20099	9.02696	4.02994	0.00120914	0.0175823	-0.863348
212572_at	STK38L	1.19983	10.0086	5.3832	9.19928e-05	0.00499971	1.63131
219216_at	ETAA1	1.19951	4.59977	4.41954	0.000564186	0.0118984	-0.12518
224793_s_at	TGFBR1	1.19785	11.9274	7.10026	4.93834e-06	0.00177911	4.42951
209748_at	SPAST	1.19757	9.46958	7.40689	3.05503e-06	0.00155357	4.88163
218859_s_at	ESF1	1.1961	6.40719	4.62325	0.00038099	0.00974761	0.255376
218919_at	ZFAND1	1.19546	6.80135	5.45873	8.02028e-05	0.00475739	1.76378
218718_at	PDGFC	1.19483	7.75082	4.44782	0.000534113	0.0116143	-0.0720925
225045_at	CCDC88A	1.19458	6.73928	5.22503	0.000122905	0.0056866	1.35124
219787_s_at	ECT2	1.19454	4.29278	4.21529	0.000839918	0.0144674	-0.510701
201448_at	TIA1	1.19389	10.3577	3.55706	0.00309562	0.0292421	-1.77014
242136_x_at	MGC70870	1.19386	5.57575	6.54945	1.20753e-05	0.00224967	3.58131
212629_s_at	PKN2	1.19347	12.2261	8.21335	9.14645e-07	0.00113104	6.0045
218604_at	LEMD3	1.19275	10.1726	6.01331	3.0004e-05	0.00311285	2.71063
228334_x_at	CEP44	1.1903	7.06798	4.03323	0.00120133	0.0175341	-0.857079
218513_at	TMA16	1.1902	3.69481	4.28035	0.00073961	0.0136018	-0.387516
203465_at	MRPL19	1.18934	6.80353	4.86843	0.000238998	0.00771581	0.707334
1557166_at	PDCD4	1.18894	4.00358	4.60455	0.000394893	0.00990403	0.220633
213070_at	PIK3C2A	1.18884	8.49989	5.37129	9.40107e-05	0.0050566	1.61034
221749_at	YTHDF3	1.18862	11.5248	7.69105	1.97899e-06	0.00141559	5.28807
225724_at	FLJ31306	1.18771	9.87134	3.20252	0.00629334	0.0434283	-2.44954
202318_s_at	SENP6	1.18739	9.83523	4.60093	0.000397646	0.00994569	0.2139
219342_at	CASD1	1.18565	5.90441	4.06501	0.00112835	0.0169564	-0.796456
225171_at	ARHGAP18	1.185	7.77779	5.07625	0.000161887	0.00637694	1.08464
238907_at	ZNF780A	1.1848	5.88537	5.36672	9.47982e-05	0.00508249	1.60228
225174_at	DNAJC10	1.18451	8.97111	4.65388	0.000359292	0.00942927	0.312218
221505_at	ANP32E	1.18446	10.4378	4.3651	0.000627065	0.0125723	-0.22758
202603_at	ADAM10	1.18431	14.4096	8.79467	4.0249e-07	0.000923525	6.75704
218005_at	ZNF22	1.18107	8.63408	5.10024	0.000154825	0.00629839	1.12783
222843_at	FIGNL1	1.18034	6.19754	5.73384	4.89851e-05	0.003837	2.23927
212721_at	SREK1	1.1795	8.8493	4.05549	0.00114973	0.0171105	-0.814609
223342_at	RRM2B	1.17833	9.62792	4.1605	0.000935157	0.015258	-0.614702
213118_at	UHRF1BP1L	1.17763	8.10029	5.8261	4.16166e-05	0.00359835	2.39619
203840_at	BLZF1	1.17593	5.08262	5.08232	0.000160069	0.00635498	1.09558
222572_at	PDP1	1.1748	10.4539	5.16952	0.000136164	0.0059463	1.25213
235648_at	ZNF567	1.1745	6.28169	5.33624	0.000100221	0.0051754	1.54852
227278_at	TAF13	1.17321	8.64807	6.69532	9.49129e-06	0.0021804	3.81048
222533_at	CRBN	1.17294	10.8959	4.98163	0.000193176	0.00689337	0.913537
203429_s_at	SUCO	1.17288	7.91656	4.49799	0.000484759	0.0110619	0.021883
228365_at	CPNE8	1.17214	5.43962	5.34026	9.94885e-05	0.00517066	1.55561
202506_at	SSFA2	1.17158	9.99822	5.46018	7.9993e-05	0.00475409	1.76631
204900_x_at	SAP30	1.17109	7.44688	5.15885	0.00013888	0.00599571	1.23302
220206_at	ZMYM1	1.17099	5.93648	6.06208	2.75747e-05	0.00296706	2.79166
212652_s_at	SNX4	1.17029	7.24309	5.65701	5.61586e-05	0.00398562	2.1076
225462_at	TMEM128	1.16973	7.20602	3.64384	0.00260296	0.0264726	-1.60339
208993_s_at	PPIG	1.1695	9.647	3.98632	0.00131794	0.0182982	-0.946666
235007_at	BBS7	1.16928	4.46574	4.71147	0.000321877	0.00890724	0.418807
226464_at	C3orf58	1.16893	9.97757	6.35026	1.68557e-05	0.00249562	3.26301
201152_s_at	MBNL1	1.1689	16.6929	5.81644	4.23308e-05	0.00360676	2.37982
229123_at	ZNF224	1.1671	6.55984	5.04132	0.000172776	0.00653443	1.02162
211009_s_at	ZNF271	1.16683	7.18993	3.81969	0.00183374	0.0220026	-1.26573
219960_s_at	UCHL5	1.16534	7.86728	6.60366	1.1038e-05	0.00224381	3.66686
221750_at	HMGCS1	1.16502	5.87108	4.48236	0.000499612	0.0112459	-0.00736889
203640_at	MBNL2	1.16497	8.31494	5.68912	5.3036e-05	0.00393452	2.16273
218519_at	SLC35A5	1.1629	7.71933	6.6466	1.02828e-05	0.00220901	3.73431
203049_s_at	TTC37	1.16184	9.5939	4.6646	0.000352	0.00934327	0.332092
217816_s_at	PCNP	1.16152	11.1202	6.14429	2.39342e-05	0.00283722	2.92744
212297_at	ATP13A3	1.16111	8.78374	6.74895	8.69355e-06	0.00208316	3.89391
213017_at	ABHD3	1.15884	12.8224	4.42312	0.000560282	0.011856	-0.118451
230820_at	CEP95	1.15841	6.33694	5.6844	5.34832e-05	0.00393585	2.15464
225200_at	DPH3	1.1575	8.62177	5.2868	0.000109715	0.00537999	1.46102
225889_at	AEBP2	1.15666	8.33574	3.86277	0.00168338	0.0210979	-1.18313
212397_at	RDX	1.15663	7.55122	4.84564	0.000249511	0.00787759	0.665623
218311_at	MAP4K3	1.15652	4.53613	3.79405	0.00192967	0.0225314	-1.31493
205281_s_at	PIGA	1.1564	5.56921	5.71222	5.09015e-05	0.00386908	2.2023
228189_at	BAG4	1.15636	8.57694	6.83316	7.57993e-06	0.00192341	4.02403
223391_at	SGPP1	1.15609	9.60844	5.97435	3.21051e-05	0.00321553	2.64564
1564002_a_at	AK9	1.15594	5.01082	4.82441	0.00025973	0.00800042	0.626725
213304_at	FAM179B	1.15589	5.78825	4.99496	0.000188413	0.00679516	0.937718
210346_s_at	CLK4	1.15553	9.05818	3.57366	0.00299462	0.028711	-1.73825
223065_s_at	STARD3NL	1.15509	10.3184	5.68609	5.33222e-05	0.00393585	2.15754
225537_at	TRAPPC6B	1.15413	8.09444	4.97243	0.000196534	0.00696854	0.896846
204194_at	BACH1	1.15409	13.027	4.16252	0.000931464	0.0152387	-0.610871
226128_at	BROX	1.15367	11.9273	7.28047	3.71841e-06	0.00166642	4.69695
204780_s_at	FAS	1.15324	10.4386	3.10876	0.00759095	0.0482992	-2.628
221622_s_at	TMEM126B	1.15257	8.2888	3.68728	0.00238685	0.0252079	-1.51992
225688_s_at	PHLDB2	1.15053	6.47288	4.47459	0.000507176	0.0113275	-0.0219335
225424_at	GPAM	1.15025	5.00551	5.05624	0.000168035	0.00647691	1.04856
204354_at	POT1	1.15	6.76076	5.82257	4.18763e-05	0.00360541	2.39021
228543_at	PET117	1.14986	4.97551	5.58091	6.43492e-05	0.00431692	1.97633
221014_s_at	RAB33B	1.14979	8.51145	3.80078	0.00190401	0.0224115	-1.30201
214830_at	SLC38A6	1.14957	4.84844	5.41752	8.64277e-05	0.004878	1.69159
226747_at	TXNDC16	1.14884	5.95829	6.35683	1.66697e-05	0.0024902	3.27362
219972_s_at	PCNXL4	1.14777	5.81157	3.73654	0.00216366	0.0240102	-1.42531
222839_s_at	PAPOLG	1.14657	9.21333	5.40534	8.83609e-05	0.00491028	1.67022
202076_at	BIRC2	1.14593	11.0829	4.4052	0.000580098	0.0121011	-0.152135
226493_at	KCTD18	1.14574	9.11434	7.60754	2.24597e-06	0.00144469	5.16986
230029_x_at	UBR3	1.14556	8.69932	6.34136	1.71109e-05	0.00250675	3.24865
228455_at	RP5-1074L1.4	1.14411	6.57039	3.24508	0.00577958	0.0413373	-2.3683
226502_at	ELMOD2	1.14388	7.06823	6.05305	2.80082e-05	0.00297677	2.77669
238974_at	C2orf69	1.14125	9.04165	5.18051	0.000133426	0.00590593	1.27178
229533_x_at	ZNF680	1.14114	4.84949	5.76123	4.66653e-05	0.00376464	2.28599
203603_s_at	ZEB2	1.1383	10.6512	4.12795	0.000996896	0.0158722	-0.676589
209898_x_at	ITSN2	1.13827	12.559	6.794	8.07793e-06	0.00200755	3.96365
204226_at	STAU2	1.13781	6.24621	8.62667	5.08217e-07	0.000958164	6.54427
211675_s_at	MDFIC	1.13711	11.9333	3.65013	0.00257049	0.0262673	-1.59131
225049_at	BLOC1S2	1.13658	11.0993	3.56782	0.00302975	0.0288944	-1.74947
223542_at	ANKRD32	1.13613	7.2322	4.0193	0.00123481	0.017779	-0.883668
209476_at	TMX1	1.13557	11.172	4.74101	0.000304268	0.00861514	0.47334
202850_at	ABCD3	1.13504	8.83567	6.11904	2.49954e-05	0.00287037	2.88585
202325_s_at	ATP5J	1.13488	9.60996	3.08733	0.00792296	0.0494447	-2.66868
203351_s_at	ORC4	1.13453	8.14477	4.54682	0.000441225	0.0105115	0.113094
218437_s_at	LZTFL1	1.13419	6.05281	5.55299	6.76578e-05	0.00443017	1.92796
234344_at	LOC100288675	1.13187	6.15938	5.63611	5.82929e-05	0.0040653	2.07164
219368_at	NAP1L2	1.12971	5.857	3.16936	0.00672496	0.0450732	-2.51274
212749_s_at	RCHY1	1.12822	8.10337	4.21783	0.000835765	0.0144606	-0.5059
234970_at	TC2N	1.12794	7.26616	3.83955	0.0017628	0.0216034	-1.22764
225619_at	SLAIN1	1.1279	7.13361	3.93111	0.00147006	0.0194936	-1.05225
212918_at	RECQL	1.1276	9.843	4.65563	0.000358092	0.0094219	0.315459
219317_at	POLI	1.1275	5.99854	4.25677	0.000774471	0.0138925	-0.43213
225084_at	EXOC5	1.12678	8.9965	7.16066	4.48822e-06	0.00173191	4.5197
202777_at	SHOC2	1.12573	11.6537	6.22525	2.08381e-05	0.00273219	3.06013
235304_at	CTD-2528L19.6	1.12531	5.13141	4.37171	0.000619065	0.0124944	-0.215139
226392_at	RASA2	1.12487	12.9648	4.55926	0.00043079	0.0103732	0.136294
227856_at	C4orf32	1.12482	7.89045	5.72378	4.98673e-05	0.00384615	2.22208
222872_x_at	NABP1	1.12469	11.5909	5.8072	4.30262e-05	0.00361839	2.36414
207121_s_at	MAPK6	1.1239	7.84829	4.23153	0.000813644	0.0142446	-0.479922
214429_at	MTMR6	1.12351	10.5928	4.54259	0.00044483	0.0105377	0.105205
225847_at	NCEH1	1.12297	5.93116	6.45925	1.40344e-05	0.00229739	3.43794
212754_s_at	MON2	1.12254	7.81228	3.66934	0.00247383	0.0257142	-1.5544
225144_at	BMPR2	1.12247	7.59324	6.0746	2.69847e-05	0.00294315	2.81241
222830_at	GRHL1	1.12201	5.53025	4.33137	0.000669586	0.0129779	-0.291154
218127_at	NFYB	1.1217	6.38674	3.46742	0.00370347	0.032197	-1.94233
227639_at	PIGK	1.12099	8.46347	4.64063	0.000368519	0.00957641	0.287638
225132_at	FBXL3	1.12023	14.0656	5.20916	0.000126554	0.00575437	1.32294
210690_at	KLRC4	1.11862	4.38726	3.4307	0.00398585	0.0334808	-2.01281
218669_at	RAP2C	1.11842	10.3887	6.59394	1.12169e-05	0.00224967	3.65154
219158_s_at	NAA15	1.11825	8.35583	3.71232	0.00227066	0.0246179	-1.47184
238609_at	FAM200A	1.11627	4.31058	5.13739	0.000144509	0.00613434	1.19456
238458_at	MICU3	1.11613	3.41487	3.9024	0.00155612	0.0201804	-1.10721
202673_at	DPM1	1.11533	10.0796	3.99043	0.00130728	0.0182422	-0.938813
202169_s_at	AASDHPPT	1.11354	10.3919	4.99013	0.000190122	0.0068253	0.92897
219347_at	NUDT15	1.11338	5.3565	4.92681	0.000214106	0.00730265	0.813892
214467_at	GPR65	1.11323	10.8408	3.56362	0.0030553	0.0290325	-1.75754
223993_s_at	CNIH4	1.11312	9.69914	4.23322	0.000810957	0.0142112	-0.476717
1569003_at	VMP1	1.11304	5.98704	3.83948	0.00176305	0.0216034	-1.22778
1554414_a_at	OSGIN2	1.11208	8.2209	4.549	0.000439378	0.010495	0.117159
227577_at	EXOC8	1.11199	9.32648	5.27937	0.00011122	0.00541653	1.44786
222607_s_at	DIS3	1.11189	7.64938	5.23862	0.000119868	0.0056063	1.37544
205728_at	TENM1	1.11079	4.6915	4.18846	0.000885256	0.0148445	-0.561609
228190_at	ATG4C	1.11068	6.29124	6.75206	8.64957e-06	0.00208316	3.89873
1556185_a_at	CTB-167B5.2	1.11024	11.0948	3.64157	0.00261478	0.0265681	-1.60775
202930_s_at	SUCLA2	1.10995	7.26533	4.79238	0.00027598	0.00820954	0.567912
228745_at	SGTB	1.10961	10.2572	4.5474	0.000440731	0.0105057	0.11418
220643_s_at	FAIM	1.10926	4.90085	4.08638	0.00108185	0.0165446	-0.755736
211967_at	TMEM123	1.10896	14.9097	3.3351	0.00482653	0.0373307	-2.1961
212006_at	UBXN4	1.10884	11.0589	4.82657	0.000258672	0.00798581	0.630682
205087_at	RWDD3	1.10806	4.69054	4.9585	0.000201737	0.00705789	0.871535
222754_at	TRNT1	1.108	7.56621	3.62057	0.00272674	0.0272052	-1.64811
227761_at	MYO5A	1.10797	9.13105	5.90275	3.63777e-05	0.00341744	2.52558
218962_s_at	TMEM168	1.10788	8.07855	4.42458	0.000558703	0.0118516	-0.115715
228915_at	DACH1	1.10774	5.18198	4.86416	0.000240931	0.00774053	0.699528
225989_at	HERC4	1.10742	8.15496	4.89862	0.000225773	0.00749494	0.762487
225574_at	RWDD4	1.10608	7.49745	4.08851	0.00107732	0.0165086	-0.751678
202890_at	MAP7	1.10584	6.13961	3.57124	0.0030091	0.0287929	-1.74289
222605_at	RCOR3	1.10556	9.24607	5.4655	7.92252e-05	0.00475409	1.77563
226186_at	TMOD2	1.10554	6.67791	3.80407	0.00189157	0.0223375	-1.29569
212579_at	SMCHD1	1.10544	14.5071	4.34968	0.000646154	0.012777	-0.256639
225470_at	NUP35	1.10511	6.89487	3.29609	0.0052186	0.0390057	-2.27078
240239_at	ZNF566	1.10249	4.09131	4.65566	0.000358066	0.0094219	0.31553
210260_s_at	TNFAIP8	1.10247	13.713	3.9543	0.0014041	0.0189406	-1.00788
226458_at	RP1-39G22.7	1.1024	6.55666	4.70014	0.000328904	0.00902437	0.397874
218637_at	IMPACT	1.10237	6.05999	5.26904	0.000113348	0.00548435	1.42953
202778_s_at	ZMYM2	1.10205	9.16849	5.19663	0.000129513	0.00579945	1.30058
202304_at	FNDC3A	1.09896	8.96672	4.73982	0.000304958	0.00862129	0.471144
222811_at	CMTR2	1.09842	8.7342	7.19302	4.26505e-06	0.00173191	4.56778
231252_at	KANSL1L	1.09778	7.08934	3.44219	0.00389522	0.0330784	-1.99075
226921_at	UBR1	1.09546	8.92944	4.06088	0.00113757	0.0170308	-0.804327
229431_at	RFXAP	1.09501	5.85552	3.71878	0.00224162	0.0244438	-1.45943
222714_s_at	LACTB2	1.09498	6.22498	5.6815	5.37602e-05	0.00394678	2.14966
203403_s_at	RNF6	1.09394	10.7852	5.21884	0.000124315	0.00570213	1.3402
205027_s_at	MAP3K8	1.09364	9.431	5.89162	3.70936e-05	0.00342915	2.50685
212795_at	KIAA1033	1.09362	11.709	4.21512	0.000840199	0.0144674	-0.511024
214440_at	NAT1	1.09312	6.58249	4.33544	0.000664305	0.012958	-0.283482
225022_at	GOPC	1.09307	7.40814	5.30037	0.000107019	0.00531448	1.48509
206003_at	CEP135	1.09225	7.10988	4.96364	0.0001998	0.00705192	0.880883
218304_s_at	OSBPL11	1.09094	10.9225	4.91355	0.000219513	0.00739157	0.789732
218823_s_at	KCTD9	1.0897	7.37089	4.64801	0.000363348	0.00950528	0.301337
219303_at	RNF219	1.08901	7.21786	4.21597	0.000838808	0.0144674	-0.509419
225365_at	ZDHHC20	1.08883	10.0266	7.05441	5.31165e-06	0.00177911	4.36068
227665_at	BC062753	1.08773	8.35637	4.3512	0.000644247	0.0127578	-0.253774
212919_at	DCP2	1.08747	12.831	5.31158	0.000104844	0.00528326	1.50493
202609_at	EPS8	1.08599	4.27101	4.19847	0.000868056	0.0146899	-0.542609
230304_at	CTB-31O20.2	1.0858	6.45833	3.96098	0.00138567	0.0188321	-0.995113
223300_s_at	CCDC82	1.08543	6.80483	3.22315	0.0060389	0.0422653	-2.41018
224876_at	C5orf24	1.08478	9.76049	4.83569	0.000254249	0.00792988	0.647392
238762_at	MTHFD2L	1.08422	5.71454	5.1171	0.000150052	0.00622269	1.15814
226633_at	RAB8B	1.08316	14.9775	7.0313	5.51104e-06	0.00177911	4.32586
203080_s_at	BAZ2B	1.08224	10.3378	4.64705	0.000364016	0.00951366	0.299555
222111_at	FAM63B	1.08167	8.2598	7.20559	4.18155e-06	0.00173191	4.58641
218946_at	NFU1	1.08095	6.24189	3.71016	0.00228045	0.024685	-1.47599
226038_at	LONRF1	1.07968	8.27731	6.24062	2.02994e-05	0.00270699	3.08521
205842_s_at	JAK2	1.07932	8.01485	3.95419	0.00140439	0.0189406	-1.00808
201652_at	COPS5	1.07918	8.54053	5.06003	0.000166853	0.00646384	1.05539
225512_at	ZBTB38	1.07847	10.0021	3.93148	0.001469	0.019485	-1.05155
223273_at	C14orf142	1.07805	5.96354	3.78846	0.00195124	0.0226883	-1.32565
225623_at	CIPC	1.07695	6.75617	3.31645	0.00501017	0.0381334	-2.23182
204605_at	CGRRF1	1.07602	6.41247	4.5	0.000482884	0.0110439	0.0256391
232024_at	GIMAP2	1.07459	11.7234	3.74516	0.00212683	0.0237783	-1.40876
201795_at	LBR	1.07359	15.0512	4.82501	0.000259437	0.00800042	0.627819
213452_at	ZNF184	1.07353	6.2325	5.50676	7.35337e-05	0.00459897	1.84759
219292_at	THAP1	1.07347	7.69238	6.09634	2.59917e-05	0.00291806	2.84837
212990_at	SYNJ1	1.0734	8.82323	5.22028	0.000123984	0.00569287	1.34278
242714_at	LOC101928429	1.07264	7.20827	5.39709	8.96965e-05	0.00493582	1.65573
224619_at	CASC4	1.07254	12.9954	4.8846	0.000231818	0.00758507	0.736889
202146_at	IFRD1	1.07253	11.4658	3.59997	0.00284128	0.0278513	-1.6877
217987_at	ASNSD1	1.07121	9.95348	4.76334	0.000291621	0.00847653	0.514488
226660_at	RPS6KB1	1.07008	8.92633	6.8942	6.86716e-06	0.00188348	4.11765
223370_at	PLEKHA3	1.06858	8.40842	5.67991	5.39125e-05	0.00394678	2.14693
229090_at	ZEB1-AS1	1.06825	5.4707	5.08177	0.000160233	0.00635498	1.09459
203306_s_at	SLC35A1	1.06752	9.82128	4.09356	0.00106667	0.0164298	-0.742062
218313_s_at	GALNT7	1.06395	10.2694	5.77877	4.52401e-05	0.00370285	2.31585
203343_at	UGDH	1.06259	6.94157	7.63719	2.14707e-06	0.00144469	5.21194
232087_at	CXorf23	1.06174	5.70018	6.00095	3.06543e-05	0.00314832	2.69004
242224_at	GPATCH2	1.06158	4.70077	4.80728	0.000268297	0.00814272	0.595275
225950_at	SAMD8	1.06134	9.13802	4.9509	0.000204633	0.00710369	0.85773
209510_at	RNF139	1.06103	9.47863	6.78075	8.25402e-06	0.00202372	3.94318
205443_at	SNAPC1	1.06044	5.42454	5.24031	0.000119496	0.0056033	1.37845
209022_at	STAG2	1.06016	13.6568	5.52936	7.05974e-05	0.00451981	1.88692
223243_s_at	EDEM3	1.05997	8.53053	6.3401	1.71472e-05	0.00250675	3.24662
208787_at	MRPL3	1.05956	8.56908	4.06722	0.00112345	0.0169121	-0.792244
226110_at	PTAR1	1.05917	9.64359	5.57581	6.49403e-05	0.0043353	1.96751
205771_s_at	AKAP7	1.05844	7.28436	7.09598	4.97204e-06	0.00177911	4.42309
209884_s_at	SLC4A7	1.05674	8.77168	3.88022	0.00162607	0.0207046	-1.14969
227124_at	SMIM13	1.05592	7.02443	5.61911	6.00925e-05	0.00411299	2.04233
243581_at	RP11-456P18.2	1.05407	4.23162	4.58054	0.00041352	0.0101706	0.175956
224377_s_at	RAB18	1.05405	10.2381	3.18231	0.00655301	0.044491	-2.48807
203765_at	GCA	1.05201	16.5801	3.35095	0.00467583	0.0367051	-2.16575
227288_at	SREK1IP1	1.05081	7.47448	3.94889	0.00141922	0.0190794	-1.01823
219276_x_at	CAAP1	1.05058	8.72395	5.34296	9.89982e-05	0.00516415	1.56039
224959_at	SLC26A2	1.05046	9.07737	4.98304	0.000192666	0.00688949	0.916096
225707_at	ARL6IP6	1.05004	10.9443	4.2453	0.000792022	0.014046	-0.453835
212460_at	SPTSSA	1.04971	9.28516	7.10077	4.93438e-06	0.00177911	4.43027
226604_at	TMTC3	1.0494	6.30765	4.14597	0.000962223	0.015542	-0.642323
215239_x_at	ZNF273	1.04908	4.23711	7.23428	3.99733e-06	0.00172725	4.62886
223324_s_at	TRPM7	1.04795	6.91987	3.41264	0.00413254	0.0342033	-2.04745
218721_s_at	C1orf27	1.04599	6.20243	4.3648	0.000627426	0.012575	-0.228138
219079_at	CYB5R4	1.0454	10.554	5.98477	3.15287e-05	0.00320779	2.66304
203303_at	DYNLT3	1.04311	8.39848	3.98311	0.00132633	0.0183866	-0.952798
201472_at	VBP1	1.04309	9.69905	4.12587	0.00100098	0.0159048	-0.680544
201273_s_at	SRP9	1.04277	13.2736	5.1977	0.000129258	0.00579757	1.30248
201952_at	ALCAM	1.04274	8.25606	3.79382	0.00193054	0.0225314	-1.31537
1556678_a_at	CTC-471J1.2	1.04233	4.34629	5.64197	5.76858e-05	0.00405426	2.08173
212977_at	ACKR3	1.04162	6.23131	4.04919	0.00116409	0.0172344	-0.826623
1554786_at	CASS4	1.04088	6.11271	5.17005	0.000136032	0.0059463	1.25306
230285_at	SVIP	1.04044	7.79112	4.19425	0.000875261	0.0147779	-0.550614
235158_at	TMEM209	1.0401	6.59879	3.59838	0.0028503	0.0279134	-1.69075
210970_s_at	IBTK	1.03934	7.57425	4.60804	0.000392264	0.00986525	0.227108
236166_at	LOC285147	1.03934	7.14877	4.47954	0.000502346	0.0112842	-0.0126599
203987_at	FZD6	1.03916	4.27579	4.79016	0.000277147	0.00822639	0.563824
203341_at	CEBPZ	1.0391	8.90899	4.188	0.000886047	0.0148445	-0.562473
218404_at	SNX10	1.03809	13.9667	4.09604	0.00106146	0.0163988	-0.737325
228095_at	PHF14	1.03797	7.69497	3.49772	0.00348564	0.0310639	-1.88414
218230_at	ARFIP1	1.0377	9.72122	4.72982	0.000310819	0.00870302	0.452694
213111_at	PIKFYVE	1.03765	11.1192	5.1026	0.000154147	0.00628774	1.13207
219484_at	HCFC2	1.03671	6.03316	5.66603	5.52619e-05	0.00396346	2.12311
202377_at	LEPROT	1.03595	11.1251	5.02752	0.000177285	0.00659312	0.996674
206854_s_at	MAP3K7	1.03584	9.02579	5.15861	0.00013894	0.00599571	1.23259
212406_s_at	PCMTD2	1.03531	12.0957	5.8449	4.02632e-05	0.00355969	2.428
236488_s_at	CTD-3092A11.2	1.03503	8.67033	3.35509	0.0046372	0.0365225	-2.15781
204243_at	RLF	1.03373	8.25347	4.33536	0.000664409	0.012958	-0.283634
201567_s_at	GOLGA4	1.03316	8.29625	3.83781	0.0017689	0.0216364	-1.23098
229025_s_at	IMMP1L	1.032	4.22085	4.50639	0.000476973	0.0109897	0.0375783
221787_at	C6orf120	1.03148	9.30993	5.07549	0.000162117	0.00638137	1.08327
208671_at	SERINC1	1.02954	13.8902	5.48615	7.6321e-05	0.00467769	1.81168
203357_s_at	CAPN7	1.02896	7.23116	3.85438	0.00171163	0.0212931	-1.19921
220416_at	ATP8B4	1.02885	4.36381	5.78492	4.47511e-05	0.00368489	2.32631
208986_at	TCF12	1.0283	8.75228	4.91467	0.000219054	0.00738524	0.79176
207315_at	CD226	1.02814	6.45107	4.28868	0.000727685	0.0135051	-0.371769
226438_at	SNTB1	1.02618	7.6166	5.54287	6.89012e-05	0.00447047	1.91039
219467_at	GIN1	1.02581	4.94789	3.55234	0.00312498	0.0293695	-1.77921
228345_at	CHIC1	1.02493	6.66366	3.14991	0.00699161	0.0459786	-2.54976
242521_at	LOC100505812	1.02476	11.5752	6.19006	2.21288e-05	0.00278301	3.00258
235125_x_at	FAM73A	1.02474	6.50752	4.38328	0.000605308	0.0123582	-0.193362
202381_at	ADAM9	1.02469	8.15857	5.68096	5.38115e-05	0.00394678	2.14874
203310_at	STXBP3	1.02446	12.2987	4.3781	0.000611427	0.0124151	-0.203109
218256_s_at	NUP54	1.02272	9.1167	3.50665	0.00342395	0.0307452	-1.86699
224850_at	ATAD1	1.02228	8.90476	4.52272	0.000462188	0.0107854	0.0681004
203531_at	CUL5	1.02227	9.28588	4.74643	0.000301145	0.00859383	0.483338
1552310_at	C15orf40	1.02194	7.6941	3.23278	0.00592363	0.0418821	-2.3918
235296_at	EIF5A2	1.02123	5.76373	4.67011	0.000348315	0.00931463	0.342293
205173_x_at	CD58	1.02098	9.82507	5.40371	8.86235e-05	0.00491531	1.66736
203914_x_at	HPGD	1.02049	6.86469	4.33165	0.000669228	0.0129779	-0.290636
203177_x_at	TFAM	1.0187	8.38715	4.64156	0.00036786	0.00957293	0.289373
212907_at	SLC30A1	1.01804	10.7521	5.05911	0.000167138	0.00646384	1.05374
213246_at	TMEM251	1.01795	9.00779	5.67013	5.48598e-05	0.00396203	2.13015
203810_at	DNAJB4	1.01769	5.44837	3.85421	0.00171221	0.0212943	-1.19953
212449_s_at	LYPLA1	1.01606	12.1113	4.66685	0.000350489	0.00932485	0.336262
203693_s_at	E2F3	1.01567	10.9783	4.07086	0.00111542	0.0168469	-0.785303
226283_at	POC1B	1.01535	8.72997	4.2442	0.000793728	0.0140626	-0.45592
235798_at	TMEM170B	1.01507	8.43607	3.55447	0.0031117	0.0292877	-1.77512
243916_x_at	UBLCP1	1.01467	11.5517	7.51087	2.60312e-06	0.00151057	5.03174
202749_at	WRB	1.01363	8.91789	3.34514	0.00473053	0.0369172	-2.17688
238057_at	USP45	1.01271	5.76405	3.76269	0.00205388	0.0233705	-1.37511
226247_at	PLEKHA1	1.01157	9.21737	3.68336	0.00240562	0.025321	-1.52747
225036_at	TOMM5	1.0114	6.99723	3.56258	0.00306168	0.0290444	-1.75954
225327_at	FAM214A	1.01027	9.847	4.03656	0.00119345	0.0174895	-0.850715
206157_at	PTX3	1.01002	4.15849	4.82485	0.000259515	0.00800042	0.627526
209323_at	PRKRIR	1.00987	10.3263	4.85525	0.000245019	0.00780755	0.683225
226800_at	EFCAB7	1.00969	3.82871	3.56206	0.00306483	0.0290617	-1.76053
203654_s_at	COIL	1.00908	7.79169	3.37471	0.00445857	0.0357438	-2.1202
213734_at	RFC5	1.00749	9.15719	5.75568	4.71262e-05	0.00377251	2.27652
222620_s_at	DNAJC1	1.00723	9.91498	6.45486	1.41379e-05	0.00230743	3.43093
238739_at	IPMK	1.00675	7.79926	3.17989	0.00658485	0.0446117	-2.49269
227836_at	UTP23	1.00662	8.75953	4.54498	0.000442788	0.0105213	0.109665
213817_at	IRAK3	1.00607	8.47848	4.4673	0.000514364	0.0113956	-0.0355743
225446_at	BRWD1	1.00581	6.69582	4.7859	0.000279396	0.00827071	0.55599
228933_at	NHS	1.00504	6.11223	4.53096	0.000454908	0.0106972	0.0834891
1558943_x_at	ZNF765	1.00388	8.31639	6.11412	2.52078e-05	0.00288334	2.87774
232563_at	ZNF684	1.00387	3.77054	3.52817	0.00327967	0.030127	-1.82564
225017_at	CCDC14	1.00348	7.12973	3.79608	0.00192187	0.0224889	-1.31102
224365_s_at	TIGD7	1.00322	5.32159	3.67418	0.00245005	0.0255739	-1.54509
226140_s_at	OTUD1	1.003	11.8797	6.53064	1.24588e-05	0.0022595	3.55151
213416_at	ITGA4	1.00278	10.5986	3.16764	0.00674817	0.0451709	-2.51603
201996_s_at	SPEN	1.00219	11.4927	4.62592	0.000379047	0.00973844	0.260334
209666_s_at	CHUK	1.00206	8.82112	6.55071	1.205e-05	0.00224967	3.5833
209296_at	PPM1B	1.00157	11.8518	5.03413	0.000175111	0.00656444	1.00862
219335_at	ARMCX5	1.00103	6.75853	4.50049	0.000482428	0.0110439	0.0265546
235812_at	CNEP1R1	1.00088	11.7623	6.17556	2.26846e-05	0.00279109	2.97882
203202_at	KRR1	1.00063	7.6227	4.05547	0.00114977	0.0171105	-0.81465
226383_at	ARL14EP	1.0001	7.58252	4.0379	0.0011903	0.017457	-0.848158
241640_at	BCAP29	-1.0001	7.50579	-3.3098	0.00507727	0.0383583	-2.24454
222093_s_at	INO80B	-1.0007	8.74205	-3.15843	0.0068735	0.0455857	-2.53355
219071_x_at	HGH1	-1.00082	8.44357	-6.18837	2.21928e-05	0.00278301	2.99982
219680_at	NLRX1	-1.00131	9.3581	-3.86727	0.00166839	0.0210055	-1.1745
211260_at	BMP7	-1.00158	8.46073	-6.65169	1.01969e-05	0.00220901	3.74228
203686_at	MPG	-1.00166	8.32493	-5.13848	0.000144219	0.00612678	1.19651
212716_s_at	EIF3K	-1.00258	13.338	-5.67963	5.3939e-05	0.00394678	2.14646
1555922_at	CASC10	-1.00286	8.87893	-3.3113	0.00506207	0.0383191	-2.24167
230236_at	TDRG1	-1.00347	7.61712	-3.83538	0.00177746	0.0216755	-1.23564
206419_at	RORC	-1.00446	7.8626	-5.08407	0.000159548	0.00635498	1.09873
1569871_at	LMF1	-1.00538	9.14408	-3.14585	0.00704862	0.0461703	-2.5575
225418_at	PVRL2	-1.00547	7.74355	-5.07831	0.00016127	0.00636179	1.08834
232609_at	CRB3	-1.00549	6.81209	-4.4286	0.00055437	0.0117929	-0.108171
202849_x_at	GRK6	-1.00645	10.7798	-4.78441	0.000280185	0.00828153	0.553259
201666_at	TIMP1	-1.00731	13.2596	-4.63872	0.000369866	0.00960684	0.284102
213771_at	IRF2BP1	-1.00735	8.35414	-3.33791	0.00479949	0.0372215	-2.19073
36129_at	SGSM2	-1.00763	10.4577	-5.31007	0.000105135	0.00528819	1.50225
48580_at	CXXC1	-1.008	10.636	-5.32882	0.00010159	0.00520563	1.53541
236744_at	C9orf172	-1.00824	6.89755	-3.92447	0.00148952	0.0196683	-1.06496
1552873_s_at	ASMTL-AS1	-1.00861	8.53975	-4.65574	0.000358013	0.0094219	0.315674
36084_at	CUL7	-1.01061	8.13719	-4.83017	0.000256916	0.00795794	0.637282
212439_at	IP6K1	-1.01074	10.0555	-4.89728	0.000226344	0.00750071	0.760041
214585_s_at	VPS52	-1.01355	10.068	-4.75904	0.000294012	0.00852339	0.506572
1563005_at	LOC101929441	-1.01527	8.1548	-3.38523	0.00436563	0.0352884	-2.10003
210448_s_at	P2RX5	-1.01535	10.2723	-3.10639	0.00762697	0.0484045	-2.6325
207484_s_at	EHMT2	-1.01539	7.83433	-3.92244	0.00149552	0.0197125	-1.06884
218745_x_at	TMEM161A	-1.01637	9.23945	-3.89041	0.00159356	0.0204814	-1.13018
211047_x_at	AP2S1	-1.01656	12.0704	-3.83655	0.00177334	0.0216568	-1.2334
200831_s_at	SCD	-1.01897	8.19137	-4.07441	0.00110765	0.0167696	-0.778537
226516_at	MFSD12	-1.02078	9.21494	-3.32122	0.00496252	0.0379599	-2.22268
201605_x_at	CNN2	-1.02096	11.5313	-4.12005	0.00101251	0.0159823	-0.691631
213059_at	CREB3L1	-1.02097	8.33151	-3.64453	0.0025994	0.0264512	-1.60207
1553279_at	BTNL9	-1.02163	8.47576	-3.3856	0.00436239	0.0352779	-2.09932
215690_x_at	GPAA1	-1.02438	9.40459	-5.38793	9.12041e-05	0.00499157	1.63963
223610_at	SEMA5B	-1.02519	10.7569	-4.76903	0.000288489	0.00842132	0.524953
1567624_at	TREML5P	-1.02556	6.57749	-3.20039	0.00632024	0.0435323	-2.4536
200035_at	CTDNEP1	-1.02561	12.3742	-4.46548	0.000516179	0.0114075	-0.0389891
236030_at	RCOR2	-1.02585	8.31211	-3.66428	0.0024989	0.0258519	-1.56411
229528_at	SBNO1	-1.02667	11.4833	-6.62521	1.06519e-05	0.00222056	3.70074
242683_at	LINC00668	-1.0278	7.7281	-3.48726	0.00355932	0.031462	-1.90422
1555736_a_at	AGTRAP	-1.02951	11.1152	-5.12911	0.000146746	0.00618056	1.1797
1566956_at	OR7E104P	-1.03031	10.3767	-3.93101	0.00147035	0.0194936	-1.05244
223856_at	AKR1E2	-1.03092	7.06933	-4.51179	0.000472029	0.0109172	0.0476774
206491_s_at	NAPA	-1.03214	10.1691	-3.59352	0.00287808	0.0280698	-1.70008
233287_at	SLC6A17	-1.0324	8.80916	-3.26682	0.00553354	0.0403797	-2.32677
205213_at	ACAP1	-1.03272	10.3525	-5.78305	4.48993e-05	0.00368694	2.32313
225211_at	PVRL1	-1.03308	7.99553	-3.27579	0.00543502	0.0400022	-2.30961
217736_s_at	EIF2AK1	-1.03404	14.4117	-3.30283	0.00514864	0.0386838	-2.25788
208690_s_at	PDLIM1	-1.03603	11.6947	-5.07182	0.00016323	0.00638869	1.07665
224859_at	CD276	-1.03815	7.87815	-3.71641	0.00225222	0.0245201	-1.46398
206657_s_at	MYOD1	-1.03846	8.85384	-3.50998	0.00340117	0.0306358	-1.86058
220538_at	ADM2	-1.03853	7.10952	-3.86711	0.00166894	0.0210058	-1.17482
54970_at	ZMIZ2	-1.04007	9.31176	-4.83076	0.000256629	0.00795794	0.638362
222998_at	MAF1	-1.04084	10.9347	-3.35251	0.00466123	0.0366431	-2.16276
231796_at	EPHA8	-1.04159	7.74142	-3.46861	0.00369469	0.0321462	-1.94005
224615_x_at	HM13	-1.04298	8.14892	-6.48331	1.34814e-05	0.00229355	3.47629
206213_at	WNT10B	-1.04356	7.66784	-3.56701	0.00303464	0.0289057	-1.75101
1568986_x_at	PIGT	-1.04364	10.5289	-3.47337	0.00365966	0.031978	-1.93091
220339_s_at	TPSG1	-1.04487	8.76423	-3.70346	0.00231111	0.0248134	-1.48885
201281_at	ADRM1	-1.04673	9.62523	-7.31363	3.5309e-06	0.00163404	4.74562
49327_at	SIRT3	-1.04696	9.16938	-4.08909	0.0010761	0.0164991	-0.750577
232032_x_at	SDF4	-1.04725	10.0659	-5.42984	8.45149e-05	0.00482847	1.71321
217509_x_at	GRIK5	-1.04731	8.19792	-3.45163	0.00382234	0.0327614	-1.97263
1560767_at	HCG22	-1.04852	7.7331	-4.4808	0.000501125	0.0112661	-0.0103014
31837_at	LMF2	-1.04995	9.99434	-5.67905	5.39953e-05	0.00394678	2.14546
204745_x_at	MT1G	-1.05013	10.5256	-4.61101	0.000390031	0.00986126	0.232643
1555916_at	RPUSD3	-1.05024	9.82159	-4.56111	0.000429261	0.0103574	0.139741
201137_s_at	HLA-DPB1	-1.05441	15.2967	-4.4511	0.000530738	0.0115904	-0.0659475
236667_at	TMEM120B	-1.05485	8.4354	-3.82144	0.00182739	0.0219685	-1.26238
236275_at	KRBA1	-1.05568	8.88196	-3.62423	0.00270689	0.027085	-1.64108
214687_x_at	ALDOA	-1.05634	16.311	-5.2765	0.000111807	0.00542508	1.44276
229721_x_at	DERL3	-1.05644	7.68795	-4.18205	0.000896447	0.0149416	-0.573772
206150_at	CD27	-1.05646	10.7808	-3.90924	0.00153515	0.0200039	-1.09411
224432_at	SH3GLB2	-1.05721	8.93864	-3.6001	0.00284052	0.0278513	-1.68744
1555823_at	PACS2	-1.05791	12.6041	-3.74661	0.00212072	0.0237395	-1.40599
1552473_at	GAMT	-1.05903	9.39302	-4.28012	0.000739947	0.0136034	-0.387958
211123_at	SLC5A5	-1.06124	8.39237	-3.10001	0.00772491	0.0487905	-2.64462
228691_at	RP11-843B15.2	-1.06645	7.47385	-3.08153	0.00801521	0.0497369	-2.67967
219072_at	BCL7C	-1.06758	8.25202	-4.6645	0.000352064	0.00934327	0.331915
221227_x_at	COQ3	-1.06865	8.82676	-3.12015	0.00742021	0.0476677	-2.60637
1556340_at	MAPK12	-1.0692	7.63933	-3.23974	0.00584168	0.0415715	-2.3785
38707_r_at	E2F4	-1.07038	10.1314	-4.27895	0.000741633	0.0136115	-0.390162
205946_at	VIPR2	-1.07214	7.76378	-4.35398	0.000640772	0.0127209	-0.248535
205147_x_at	NCF4	-1.07368	11.3872	-4.38776	0.00060006	0.0123126	-0.184922
201118_at	PGD	-1.07588	10.675	-4.00119	0.00127978	0.0180195	-0.91826
215631_s_at	BRMS1	-1.07721	8.84945	-5.17898	0.000133804	0.00590593	1.26904
217969_at	VPS51	-1.07913	11.1541	-6.95787	6.19828e-06	0.00181912	4.2147
221686_s_at	RECQL5	-1.07932	8.34168	-4.13735	0.000978653	0.0156961	-0.658712
212383_at	ATP6V0A1	-1.08113	9.70998	-3.77864	0.00198972	0.0229365	-1.3445
242282_at	ZFPM1	-1.08124	8.29114	-6.07266	2.70751e-05	0.00294315	2.80921
224079_at	IL17C	-1.08336	8.16587	-3.86966	0.0016605	0.0209686	-1.16992
218143_s_at	SCAMP2	-1.08434	11.1773	-5.65891	5.59677e-05	0.00397924	2.11088
1553238_a_at	HIPK4	-1.0844	8.62474	-3.57934	0.0029608	0.0285317	-1.72733
219259_at	SEMA4A	-1.08482	9.15635	-4.75568	0.000295896	0.00854627	0.500383
1568649_at	RP11-540O11.1	-1.08584	8.19799	-4.26483	0.00076237	0.013779	-0.416876
223205_s_at	L3MBTL2	-1.08631	9.52493	-4.74459	0.000302206	0.00859383	0.47993
211231_x_at	CYP4A11	-1.08741	8.39937	-3.58574	0.00292316	0.0283108	-1.71502
1568613_at	RSPH3	-1.08752	9.906	-4.18445	0.000892236	0.0149092	-0.569213
218843_at	FNDC4	-1.08873	7.32224	-3.87075	0.00165692	0.020949	-1.16784
227700_x_at	ATAD3A	-1.08899	8.19819	-4.40214	0.000583551	0.0121038	-0.157887
224000_at	C2orf16	-1.08912	8.11101	-3.53397	0.00324184	0.0299506	-1.81449
1553728_at	LRRC43	-1.08951	10.4917	-3.17205	0.00668884	0.0449958	-2.50761
218563_at	NDUFA3	-1.09002	13.8224	-6.00475	3.04529e-05	0.00313598	2.69637
1563090_at	CCDC33	-1.09131	8.42731	-3.36231	0.00457061	0.0362434	-2.14396
34846_at	CAMK2B	-1.09259	9.43831	-4.74164	0.000303907	0.00861385	0.47449
218062_x_at	CDC42EP4	-1.09366	8.40251	-4.93135	0.000212288	0.00725881	0.822154
77508_r_at	RABEP2	-1.09437	8.7604	-3.96354	0.00137866	0.018796	-0.990208
230947_at	SEPT12	-1.0949	8.72818	-3.44827	0.00384812	0.0328795	-1.97908
211558_s_at	DHPS	-1.09498	8.66682	-4.47585	0.000505936	0.0113137	-0.0195611
1566471_at	LOC100996506	-1.09608	8.54412	-4.24888	0.00078651	0.0140042	-0.44707
211716_x_at	ARHGDIA	-1.09691	8.48451	-7.63967	2.13901e-06	0.00144469	5.21546
211456_x_at	MT1HL1	-1.10038	11.886	-4.31365	0.000693108	0.0131719	-0.324605
1553997_a_at	ASPHD1	-1.10158	8.0876	-3.56736	0.00303252	0.0289057	-1.75034
1552510_at	SLC34A3	-1.1018	11.2036	-3.25715	0.00564168	0.0408068	-2.34525
40359_at	RASSF7	-1.10241	10.557	-4.39288	0.000594123	0.0122303	-0.175286
1552501_a_at	GPBAR1	-1.10419	9.79456	-3.61926	0.00273388	0.0272394	-1.65063
218473_s_at	COLGALT1	-1.10446	9.39452	-5.17677	0.000134353	0.00591295	1.26508
213091_at	CRTC1	-1.10475	9.20003	-3.82799	0.00180374	0.0218185	-1.24981
238105_x_at	WNT7B	-1.10722	9.49528	-3.88234	0.00161927	0.0206709	-1.14564
38964_r_at	WAS	-1.10788	16.8765	-4.87105	0.000237817	0.00770756	0.712133
45749_at	FAM65A	-1.10894	11.4554	-4.49099	0.000491359	0.0111473	0.00877536
208308_s_at	GPI	-1.11435	8.63727	-5.52467	7.11967e-05	0.00453164	1.87877
38447_at	ADRBK1	-1.11602	10.546	-4.30461	0.000705433	0.0133035	-0.341682
223375_at	TBC1D22B	-1.11657	9.28336	-4.29642	0.000716784	0.0133755	-0.357147
1553222_at	OXER1	-1.11708	8.96402	-3.62611	0.00269673	0.0270341	-1.63746
210208_x_at	BAG6	-1.1218	12.8547	-3.27249	0.00547102	0.0401368	-2.31592
201903_at	UQCRC1	-1.12571	10.5387	-5.80973	4.28346e-05	0.00361417	2.36843
31846_at	RHOD	-1.12676	10.6424	-4.51693	0.000467372	0.0108462	0.057289
209166_s_at	MAN2B1	-1.1273	10.042	-5.00551	0.000184729	0.00671547	0.956839
1552395_at	TSSK3	-1.12857	9.52108	-3.77823	0.00199132	0.0229445	-1.34527
1556507_at	LINC01210	-1.13131	9.23553	-4.01029	0.00125698	0.0179019	-0.900872
1564281_at	LINC00491	-1.13304	8.25614	-3.72575	0.0022107	0.0242711	-1.44604
200697_at	HK1	-1.13421	14.6332	-5.50663	7.3551e-05	0.00459897	1.84737
215687_x_at	PLCB1	-1.13516	7.36431	-5.19551	0.00012978	0.00580256	1.29858
200695_at	PPP2R1A	-1.13647	9.78729	-6.44572	1.4356e-05	0.00232223	3.41632
1553253_at	ASB16	-1.1367	7.82606	-4.31007	0.000697963	0.0132228	-0.331369
231629_x_at	KLK3	-1.13814	10.4334	-3.92483	0.00148847	0.019667	-1.06427
203085_s_at	TGFB1	-1.13883	10.4731	-8.381	7.18945e-07	0.000971616	6.22627
1554126_at	MSRB3	-1.14014	8.23986	-3.51246	0.00338439	0.0305928	-1.85583
228257_at	ANKRD52	-1.1403	10.0533	-4.52525	0.000459934	0.0107584	0.0728381
221063_x_at	RNF123	-1.1418	9.61011	-3.40064	0.00423302	0.0346616	-2.07047
214752_x_at	FLNA	-1.14289	10.3119	-5.28299	0.000110483	0.0054031	1.45428
200011_s_at	ARF3	-1.14331	11.5855	-6.84124	7.48125e-06	0.00192341	4.03645
121_at	PAX8	-1.14332	9.63361	-4.40526	0.000580027	0.0121011	-0.152016
209179_s_at	MBOAT7	-1.14536	12.9814	-5.17237	0.00013545	0.00593406	1.25722
232234_at	SLA2	-1.14602	10.1343	-5.31044	0.000105064	0.00528819	1.5029
200678_x_at	GRN	-1.1467	11.812	-4.39045	0.000596937	0.012279	-0.179866
1559167_x_at	MPV17L	-1.14809	10.1734	-4.48641	0.000495723	0.0111952	0.000203974
234285_at	SYNGAP1	-1.14813	7.31965	-4.3708	0.000620154	0.0125072	-0.216842
224342_x_at	BMS1P20	-1.15085	8.17364	-5.62492	5.94704e-05	0.004094	2.05236
209083_at	CORO1A	-1.15247	14.5434	-4.48513	0.000496948	0.0112122	-0.00218813
230504_at	CEACAM19	-1.15469	9.00087	-3.91605	0.00151458	0.0198635	-1.08108
48030_i_at	FAXDC2	-1.15771	12.4117	-3.71611	0.00225358	0.02453	-1.46456
210357_s_at	SMOX	-1.15833	11.1661	-5.12127	0.000148896	0.00619967	1.16562
220947_s_at	TBC1D10B	-1.1616	9.69445	-3.52075	0.00332874	0.0303342	-1.83991
1555779_a_at	CD79A	-1.16257	8.94944	-5.4173	8.64614e-05	0.004878	1.69122
201481_s_at	PYGB	-1.16561	8.99622	-5.45501	8.07443e-05	0.00476235	1.75729
48659_at	MIIP	-1.167	9.46434	-6.07713	2.6867e-05	0.00294315	2.8166
231780_at	GBGT1	-1.17037	9.98955	-3.31456	0.00502911	0.038227	-2.23543
205516_x_at	CIZ1	-1.1712	8.86949	-5.27872	0.000111352	0.00541653	1.44671
35150_at	CD40	-1.17325	9.77229	-5.03832	0.000173748	0.00654699	1.01618
202517_at	CRMP1	-1.17418	7.61022	-4.13553	0.000982155	0.0157199	-0.662169
1555656_at	CD300LG	-1.17952	9.95281	-3.81611	0.00184686	0.0220809	-1.27261
217998_at	PHLDA1	-1.18026	8.80205	-3.68116	0.0024162	0.0253806	-1.5317
36994_at	ATP6V0C	-1.18079	15.621	-3.64187	0.00261319	0.0265569	-1.60717
31861_at	IGHMBP2	-1.18154	10.8444	-4.35832	0.00063538	0.0126694	-0.240346
228836_at	SLC25A35	-1.18223	7.38855	-5.13964	0.000143908	0.00612389	1.1986
223663_at	CCDC88B	-1.18289	9.99596	-5.02228	0.000179029	0.00660487	0.987192
201710_at	MYBL2	-1.18335	7.49258	-4.3774	0.000612255	0.0124166	-0.204419
210226_at	NR4A1	-1.18565	7.6953	-3.58538	0.0029253	0.0283231	-1.71573
201122_x_at	EIF5A	-1.18744	11.0285	-5.20445	0.000127656	0.00577027	1.31455
221991_at	NXPH3	-1.19268	8.17876	-4.01672	0.00124112	0.0177915	-0.888591
212555_at	PRKAR1B	-1.19532	7.7368	-4.47857	0.00050329	0.0112869	-0.014478
217917_s_at	DYNLRB1	-1.1961	11.9261	-10.1109	7.18355e-08	0.000858942	8.30007
203175_at	RHOG	-1.19794	14.1793	-6.0745	2.69894e-05	0.00294315	2.81225
201216_at	ERP29	-1.20442	11.5717	-8.20118	9.30896e-07	0.00113104	5.98824
36004_at	IKBKG	-1.2089	9.59392	-5.57016	6.56025e-05	0.00437416	1.95772
90265_at	ADAP1	-1.21259	12.8713	-4.0305	0.0012078	0.0175817	-0.862279
226667_x_at	EPN1	-1.21618	9.92268	-5.01816	0.000180412	0.00662903	0.979743
33768_at	DMWD	-1.21674	9.17733	-4.02894	0.00121154	0.0175985	-0.865264
232367_x_at	ZNF598	-1.21859	9.11032	-3.55121	0.00313204	0.0294032	-1.78138
62987_r_at	CACNG4	-1.21882	15.1012	-3.80162	0.00190081	0.0223896	-1.3004
225592_at	NRM	-1.2196	10.6453	-4.75492	0.000296328	0.00855425	0.498967
234973_at	SLC38A5	-1.23296	8.47971	-3.66614	0.00248966	0.0258051	-1.56054
230046_at	SPRED3	-1.23509	8.16516	-4.70414	0.000326407	0.00898153	0.405262
1552889_a_at	EXOC3L2	-1.23686	9.88305	-3.87883	0.00163056	0.0207376	-1.15235
201231_s_at	ENO1	-1.23723	10.8978	-6.92788	6.50431e-06	0.00183311	4.16907
244453_at	ANKRD53	-1.24282	9.24676	-4.18179	0.000896907	0.0149416	-0.574269
179_at	DTX2P1-UPK3BP1-PMS2P11	-1.24444	10.9934	-3.75632	0.00208011	0.0234979	-1.38734
225063_at	UBL7	-1.25306	9.80311	-3.74659	0.00212081	0.0237395	-1.40603
1555238_at	PTH2	-1.25798	9.42497	-4.49905	0.000483769	0.0110439	0.0238649
1555896_a_at	ADAM15	-1.25856	9.6116	-5.1496	0.000141277	0.00605355	1.21645
201390_s_at	CSNK2B	-1.26219	12.4516	-9.20918	2.29411e-07	0.000858942	7.2662
209165_at	AATF	-1.26386	8.81129	-7.37747	3.19739e-06	0.00155357	4.83887
200896_x_at	HDGF	-1.26565	15.6487	-3.85365	0.00171413	0.0212968	-1.20062
201042_at	TGM2	-1.26647	8.02814	-4.63188	0.000374738	0.0096691	0.271415
202152_x_at	USF2	-1.26773	12.4291	-3.81488	0.00185136	0.0221205	-1.27496
1568377_x_at	DEFB124	-1.26861	9.79058	-3.73467	0.00217173	0.0240482	-1.4289
241650_x_at	HMCN2	-1.27005	8.21065	-4.1743	0.00091018	0.0150624	-0.588492
1558641_at	SPATA24	-1.2829	11.7378	-4.88608	0.00023117	0.00757293	0.7396
1570266_x_at	ERVH-1	-1.28515	9.518	-4.04622	0.00117094	0.0172983	-0.832294
217040_x_at	SOX15	-1.28758	7.75656	-3.64574	0.00259308	0.0264016	-1.59973
200824_at	GSTP1	-1.29253	10.9494	-5.92904	3.47435e-05	0.00333263	2.56976
212312_at	BCL2L1	-1.29452	13.3001	-4.33376	0.000666482	0.0129591	-0.286652
33579_i_at	GALR3	-1.29516	9.15336	-3.93232	0.00146654	0.0194761	-1.04993
1565454_at	XAGE-4	-1.31074	8.70087	-4.03655	0.00119348	0.0174895	-0.850737
209930_s_at	NFE2	-1.32453	13.3327	-3.25248	0.00569462	0.0409997	-2.35417
1558890_at	LOC100507054	-1.32834	9.98431	-4.11107	0.00103054	0.0161533	-0.708715
224727_at	EMC10	-1.3304	9.64649	-4.91037	0.000220832	0.0074119	0.783927
204189_at	RARG	-1.34005	10.2997	-3.65049	0.00256865	0.0262555	-1.59062
214080_x_at	PRKCSH	-1.34169	11.3849	-5.04852	0.000170472	0.00651334	1.03461
1553114_a_at	PTK6	-1.36842	8.74758	-4.89431	0.000227614	0.0075277	0.75462
217362_x_at	HLA-DRB6	-1.38595	13.6646	-5.26552	0.000114085	0.00549568	1.42326
1564207_at	LINC00957	-1.38742	13.1775	-3.58571	0.00292338	0.0283108	-1.7151
200064_at	HSP90AB1	-1.39008	10.6552	-6.86686	7.17724e-06	0.00189573	4.07579
203028_s_at	CYBA	-1.39028	15.8848	-5.76709	4.61843e-05	0.0037489	2.29596
206050_s_at	RNH1	-1.39826	10.0921	-8.36451	7.36065e-07	0.000971616	6.20463
1552863_a_at	CACNG6	-1.40587	10.5674	-3.89491	0.00157939	0.0203615	-1.12156
39854_r_at	PNPLA2	-1.42863	12.3465	-4.5211	0.000463628	0.0107941	0.0650848
1552615_at	ACACB	-1.43237	10.0617	-3.78092	0.00198073	0.0228714	-1.34012
1556291_at	POM121L12	-1.4747	9.46524	-5.10295	0.000154047	0.00628774	1.1327
1562903_at	FAM86B3P	-1.47715	13.4241	-4.38108	0.000607899	0.0123836	-0.197501
223179_at	YPEL3	-1.47992	14.8864	-3.9659	0.00137225	0.0187429	-0.985706
1552749_a_at	KLC3	-1.4806	9.59629	-4.0083	0.00126193	0.0179071	-0.904675
211531_x_at	PRB1	-1.50566	9.58272	-3.7695	0.00202625	0.0232065	-1.36204
228361_at	E2F2	-1.51301	10.5262	-3.72926	0.00219526	0.0241807	-1.43929
1556900_at	APCDD1L-AS1	-1.52971	8.94959	-3.92967	0.00147425	0.019531	-1.055
212430_at	RBM38	-1.53599	13.708	-3.12911	0.00728841	0.0471646	-2.58932
218084_x_at	FXYD5	-1.63431	12.356	-7.39827	3.09604e-06	0.00155357	4.86911
213175_s_at	SNRPB	-1.64979	11.5807	-9.25282	2.16461e-07	0.000858942	7.31853
204187_at	GMPR	-1.71432	13.3354	-3.11245	0.00753515	0.0480743	-2.62098
214273_x_at	NPRL3	-1.7171	13.0243	-3.29042	0.00527818	0.0392899	-2.28163
202974_at	MPP1	-1.73125	15.1401	-3.44609	0.00386495	0.0329461	-1.98327
203154_s_at	PAK4	-1.74176	10.9022	-4.67674	0.000343931	0.00923827	0.354572
201052_s_at	PSMF1	-1.75251	13.0166	-4.07715	0.0011017	0.0167289	-0.773328
396_f_at	EPOR	-1.81581	12.0996	-3.92539	0.00148681	0.0196546	-1.0632
200001_at	CAPNS1	-1.84744	11.6707	-9.18345	2.3743e-07	0.000858942	7.23524
215684_s_at	ASCC2	-1.88079	12.0393	-4.32528	0.000677573	0.0130583	-0.302643
1569105_at	SETD5	-2.17319	12.5242	-3.78545	0.00196296	0.0227383	-1.33143

## Sheet: Figure 2D
	GSEA for KEGG pathways enriched in elderly CHD patients.
	KEGG Term	Enrichment	p value	Count
	Calcium signaling pathway	-0.417132	0.000224266	74
	Vascular smooth muscle contraction	-0.373854	0.00105374	50
	Cell adhesion molecules cams	-0.38169	0.00021575	48
	Ubiquitin mediated proteolysis	0.38931	0.000372648	47
	Lysosome	-0.440045	0.0002151	44
	Tight junction	-0.300361	0.0274619	42
	Cell cycle	0.323738	0.0208877	40
	Gnrh signaling pathway	-0.349444	0.0125418	35
	Antigen processing and presentation	-0.422927	0.00104037	30
	Drug metabolism cytochrome P450	-0.405475	0.0104923	27
	Vegf signaling pathway	-0.362379	0.0199211	27
	Viral myocarditis	-0.409278	0.00576488	22
	P53 signaling pathway	0.385697	0.0163265	22
	Ribosome	0.417417	0.00387297	20
	Intestinal immune network for IGA production	-0.456995	0.00421179	20
	Glycolysis gluconeogenesis	-0.395113	0.0126324	20
	Autoimmune thyroid disease	-0.444495	0.00567031	18
	Basal transcription factors	0.592997	0.000605327	17
	Glutathione metabolism	-0.459146	0.00322581	16
	Primary immunodeficiency	-0.484637	0.00679728	13

## Sheet: Figure 2E
						Core_enrichment		Calcium signaling pathway is the most significantly enriched pathway, and 74 targets are involved.
						SLC25A5	74 targets
	KEGG_CALCIUM_SIGNALING_PATHWAY					TNNC2
						ADRA1A
						CHRM2
						AGTR1
						CAMK2G
						PLCD3
						TACR3
						ITPKA
						CACNA1D
						ADRA1B
						NTSR1
						CACNA1I
						ATP2B2
						SPHK1
						CCKAR
						PTGER3
						PTK2B
						PTAFR
						DRD5
						ADRA1D
						CACNA1C
						P2RX1
						CALML3
						GRM5
						CHP1
						GNA15
						BDKRB2
						HTR6
						PHKG2
						CACNA1E
						SPHK2
						ATP2B3
						NOS1
						P2RX2
						CACNA1F
						ITPKB
						VDAC1
						ERBB2
						TACR1
						PLCD1
						TACR2
						CALML6
						PLCB2
						LTB4R2
						GNA11
						AVPR1A
						ADCY3
						SLC8A2
						CCKBR
						P2RX4
						PRKCG
						PDE1B
						SLC8A3
						GRIN1
						GRIN2A
						ADCY1
						SLC25A6
						PLCG1
						CACNA1G
						CACNA1S
						CACNA1H
						PTGER1
						HTR4
						TBXA2R
						AVPR1B
						CAMK2A
						ADCY4
						ATP2A3
						MYLK2
						GRPR
						P2RX5
						CAMK2B
						PLCB1

## Sheet: Figure 3A
	Cmax of 11 components in rat plasma after oral administration of a single dose of 8.3 g/kg TMYXP
	Compounds	C max (ng/mL)	mean	SD		n=6/group
	Rhein	Rhein	46.3	15.6
	Emodin	Emodin	88	37.5
	Stilbene glycoside	Stilbene glycoside	99.1	27.1
	Liquiritin	Liquiritin	199.9	120.2
	Ononin	Ononin	14.4	6.8
	Verbascoside	Verbascoside	23.4	8.7
	Gallic acid	Gallic acid	56.9	42.8
	Schisandrin	Schisandrin	92.6	53
	Liquiritigenin	Liquiritigenin	37.8	24.1
	Glycyrrhizic acid	Glycyrrhizic acid	476.1	146
	Isoliquiritigenin	Isoliquiritigenin	41.6	24.2

## Sheet: Figure 3B
	Toxicological parameters of 40 phytochemicals of TMYXP
		Hepatotoxicity	Carcinogenicity	Immunotoxicity	Mutagenicity	Cytotoxicity	LD50 (mg/kg)	Predicted Toxicity Class
	8-Nonenoic acid	1	1	1	1	1	2500	5
	Calycosin	1	1	0	1	1	2500	5
	Emodin	1	1	1	1	0	5000	5
	Ephedrine	1	1	1	1	1	404	4
	Formononetin	1	0	0	1	1	2500	5
	Gallic acid	1	0	1	1	1	2000	4
	Gancaonin A	1	1	0	1	1	2500	5
	Genistein	1	1	1	1	1	2500	5
	Glycyrrhisoflavanone	1	1	0	1	1	500	4
	Isoliquiritigenin	1	1	0	1	1	3600	5
	Licoricone	1	1	0	1	1	2500	5
	Liquiritigenin	1	0	1	1	1	2000	4		1	Inactive
	Liquiritin	1	1	0	1	1	2300	5		0	Active
	Lobetyol	1	1	1	1	1	1016	4
	Octanal	1	1	1	1	1	5000	5
	Ononin	1	1	0	1	1	3100	5
	Ophiopogonanone E	1	1	0	0	1	1310	4
	Pregomisin	1	1	0	1	1	2000	4
	Rhein	1	1	1	0	1	5000	5
	Schisandrin	1	1	0	1	1	1448	4
	Uralenin	1	1	0	1	1	4000	5
	Vineridine	1	0	0	1	1	406	4
THSG	2,3,5,4'-Tetrahydroxystilbene-2-O-β-D-glucoside	1	1	0	1	1	1500	4
	Isovitexin	1	1	1	0	1	159	3
	Leonuride	1	1	0	1	1	2000	4
	Lobetyolin	1	1	1	1	1	100	3
	Stilbene glycoside	1	1	0	1	1	1500	4
	Swertisin	1	1	1	1	1	4000	5
	22-Acetoxyrhaogl ycyrrhizin	1	1	0	1	1	4500	4
	Glycyrrhizic acid	1	1	0	1	1	1750	4
	Liriope muscari baily saponins C	1	1	0	1	0	55	3
	Licorice saponin A3	1	1	0	1	1	4500	4
	Licorice saponin H2	1	1	0	1	1	1750	4
	Licoricesaponin F3	1	1	0	1	1	3220	4
	24-Hydroxy-licorice-saponin A3	1	1	0	1	1	4500	4
	Codonoside B	1	1	0	1	1	3220	5
	Licoricesaponin D3	1	1	0	1	1	4500	4
	Melittoside	1	1	0	1	1	2000	4
	Verbascoside	1	1	0	1	1	5000	5
	Lobetyolinin	1	1	1	1	1	100	3

## Sheet: Figure 3C
		The 12 blood components of TMYXP correspond to 194 DEGs before and after TMYXP treatment of elderly CHD.											Among the 194 DEGs, 128 were up-regulated and 66 were down-regulated.
7	13	1	4	33	158	9	4	12	1	5	8		128 up-regulated DEGs		66 down-regulated DEGs
Calycosin	Emodin	Ephedrine	Formononetin	Gallic acid	Genistein	Isoliquiritigenin	Octanal	Rhein	Isovitexin	Glycyrrhizic acid	Verbascoside		PMAIP1		BMP7
5280448	3220	9294	5280378	370	5280961	638278	454	10168	162350	14982	5281800		MS4A3		RORC
CASP3	CXCL8	CASP3	CXCL8	PTGS2	PMAIP1	PTGS2	DNAAF2	PTGS2	AHR	PTGS2	PTGS2		INPP4B		TIMP1
TFAM	AHR		AHR	CXCL8	MS4A3	AHR	SLK	AHR		CXCL8	CXCL8		LCORL		IRF2BP1
TGFB1	RB1		CASP3	GABPA	INPP4B	CASP3	PIK3C2A	GLS		CASP3	AHR		HSPA13		SGSM2
ERP29	CASP3		RORC	SLC35A3	LCORL	USP1	UBXN4	CASP3		TGFBR1	RB1		ITGAV		VPS52
CXCL8	RCN2			SCRN3	HSPA13	BIRC2		POLK		TGFB1	POLK		PTGS2		P2RX5
GABPA	FAS			GLS	ITGAV	CHUK		RECQL			TGFBR1		CXCL8		EHMT2
TGFB1	JAK2			IKZF2	PTGS2	CYP4A11		POLI			POLI		CPEB2		SCD
	COPS5			ZNF83	CXCL8	TGFB1		BAZ2B			TGFB1		GABPA		CNN2
	RORC			CASP3	CPEB2	BCL2L1		RORC					AHR		NAPA
	EHMT2			ZNF468	AHR			EHMT2					TRIM23		SLC6A17
	TGFB1			SLC12A2	TRIM23			TGFB1					CASP8AP2		MYOD1
	CSNK2B			POLK	CASP8AP2			HSP90AB1					PHTF2		EPHA8
	GSTP1			USP32	PHTF2								DYRK2		HM13
				C9orf72	DYRK2								ASPH		WNT10B
				TBC1D15	ASPH								SLC35A3		TPSG1
				RAP1B	CCNG2								CCNG2		ALDOA
				MRPL19	PPP1R12A								PPP1R12A		DERL3
				BIRC2	KIF21A								KIF21A		CD27
				STAU2	ATF1								SCRN3		SLC5A5
				ORC4	GLS								ATF1		E2F4
				SLAIN1	ETNK1								GLS		HIPK4
				MON2	VCPKMT								ETNK1		CYP4A11
				IBTK	CETN3								VCPKMT		ATAD3A
				HPGD	RAB2A								CETN3		LRRC43
				USP45	ATF2								RAB2A		NDUFA3
				CHUK	COG6								ATF2		ARHGDIA
				TIMP1	ST8SIA4								COG6		SLC34A3
				EHMT2	RNF138								IKZF2		WAS
				NDUFA3	RB1								ST8SIA4		TBC1D22B
				TGFB1	GORAB								RNF138		MAN2B1
				MSRB3	HMGB2								RB1		PLCB1
				GBGT1	CASP3								GORAB		KLK3
				CAPNS1	PLEKHF2								ZNF83		TGFB1
					SKIL								HMGB2		MSRB3
					SLC12A2								CASP3		FLNA
					CDK8								ZNF468		MBOAT7
					AP1AR								PLEKHF2		CEACAM19
					HAUS1								SKIL		SMOX
					CHAC2								SLC12A2		CD79A
					ARHGAP12								CDK8		PYGB
					SLK								AP1AR		GBGT1
					SMC4								HAUS1		PHLDA1
					ANXA3								USP1		CCDC88B
					GPCPD1								CHAC2		MYBL2
					TMEM263								ARHGAP12		NR4A1
					SMARCA5								DNAAF2		EIF5A
					FLVCR1								SLK		ERP29
					TRPM6								SMC4		ENO1
					CSPP1								POLK		ANKRD53
					ACSL3								ANXA3		ADAM15
					HEATR5A								GPCPD1		CSNK2B
					SC5D								TMEM263		HMCN2
					MTHFD2								SMARCA5		GSTP1
					PROK2								FLVCR1		BCL2L1
					FCHO2								TRPM6		GALR3
					TMEM64								USP32		NFE2
					MASTL								CSPP1		HSP90AB1
					TMX3								ACSL3		CYBA
					LIN7A								HEATR5A		ACACB
					ECT2								RCN2		E2F2
					TIA1								SC5D		GMPR
					CEP44								MTHFD2		EPOR
					TMA16								PROK2		CAPNS1
					PDCD4								C9orf72		SETD5
					ARHGAP18								FCHO2
					RRM2B								TBC1D15
					PPIG								TMEM64
					MBNL1								MASTL
					UCHL5								TMX3
					BAG4								RAP1B
					SGPP1								LIN7A
					FAS								TGFBR1
					GPAM								ECT2
					POT1								TIA1
					BIRC2								CEP44
					TC2N								TMA16
					POLI								MRPL19
					TENM1								PDCD4
					TNFAIP8								PIK3C2A
					JAK2								ARHGAP18
					RPS6KB1								RRM2B
					UGDH								PPIG
					RNF139								MBNL1
					AKAP7								UCHL5
					RAB18								BAG4
					GCA								SGPP1
					ALCAM								FAS
					ACKR3								GPAM
					FZD6								POT1
					CEBPZ								BIRC2
					PHF14								STAU2
					CD226								ORC4
					ADAM9								TC2N
					CD58								SLAIN1
					HPGD								RECQL
					SLC30A1								POLI
					DNAJB4								MON2
					POC1B								TENM1
					ITGA4								UBXN4
					BMP7								TNFAIP8
					RORC								BAZ2B
					TIMP1								JAK2
					IRF2BP1								COPS5
					SGSM2								RPS6KB1
					VPS52								UGDH
					P2RX5								RNF139
					SCD								AKAP7
					CNN2								RAB18
					NAPA								GCA
					SLC6A17								ALCAM
					MYOD1								ACKR3
					EPHA8								IBTK
					HM13								FZD6
					WNT10B								CEBPZ
					TPSG1								PHF14
					ALDOA								CD226
					DERL3								ADAM9
					CD27								CD58
					SLC5A5								HPGD
					E2F4								TFAM
					HIPK4								SLC30A1
					ATAD3A								DNAJB4
					LRRC43								POC1B
					ARHGDIA								USP45
					SLC34A3								ITGA4
					WAS								CHUK
					TBC1D22B
					MAN2B1
					PLCB1
					KLK3
					TGFB1
					FLNA
					MBOAT7
					CEACAM19
					SMOX
					CD79A
					PYGB
					PHLDA1
					CCDC88B
					MYBL2
					NR4A1
					EIF5A
					ENO1
					ANKRD53
					ADAM15
					CSNK2B
					HMCN2
					GSTP1
					BCL2L1
					GALR3
					NFE2
					HSP90AB1
					CYBA
					ACACB
					E2F2
					GMPR
					EPOR
					SETD5

## Sheet: Figure 4A
	The PPI network of 194 anti-CHD targets of TMYXP blood components.
SUID	AverageShortestPathLength	BetweennessCentrality	ClosenessCentrality	ClusteringCoefficient	Degree	degree.layout	Eccentricity	IsSingleNode	name	NeighborhoodConnectivity	NumberOfDirectedEdges	NumberOfUndirectedEdges	PartnerOfMultiEdgedNodePairs	Radiality	selected	SelfLoops	shared name	Stress	TopologicalCoefficient
168	2.5289256198347108	0.18687715357684037	0.3954248366013072	0.17666666666666667	25	25	9	FALSE	CASP3	8.56	0	25	0	0.9388429752066116	FALSE	0	CASP3	8132	0.11561643835616438
177	2.4710743801652892	0.22486660612049716	0.40468227424749165	0.21666666666666667	25	25	8	FALSE	TGFB1	9.56	0	25	0	0.9411570247933884	FALSE	0	TGFB1	10748	0.12415584415584416
179	2.520661157024793	0.3237121235744393	0.39672131147540984	0.13	25	25	9	FALSE	HSP90AB1	8.24	0	25	0	0.9391735537190082	FALSE	0	HSP90AB1	15408	0.11068493150684931
174	2.71900826446281	0.08067513839336254	0.36778115501519754	0.23529411764705882	17	17	9	FALSE	PTGS2	9.764705882352942	0	17	0	0.9312396694214875	FALSE	0	PTGS2	3972	0.14841628959276018
162	2.9008264462809916	0.074398728225876	0.34472934472934474	0.27472527472527475	14	14	8	FALSE	FAS	9.785714285714286	0	14	0	0.9239669421487604	FALSE	0	FAS	4554	0.19285714285714287
187	2.7107438016528924	0.08041287484301801	0.36890243902439024	0.34065934065934067	14	14	9	FALSE	CXCL8	12	0	14	0	0.9315702479338843	FALSE	0	CXCL8	4212	0.1824175824175824
149	2.727272727272727	0.03502704898616335	0.3666666666666667	0.46153846153846156	13	13	9	FALSE	BCL2L1	12.923076923076923	0	13	0	0.9309090909090909	FALSE	0	BCL2L1	2518	0.18729096989966554
164	2.7851239669421486	0.1120365265626019	0.3590504451038576	0.14545454545454545	11	11	8	FALSE	FLNA	9.363636363636363	0	11	0	0.9285950413223141	FALSE	0	FLNA	4990	0.1594896331738437
144	2.809917355371901	0.04491284594767474	0.3558823529411765	0.4666666666666667	10	10	9	FALSE	JAK2	14.2	0	10	0	0.927603305785124	FALSE	0	JAK2	1840	0.22741935483870968
138	2.9173553719008263	0.01197243049513634	0.34277620396600567	0.3888888888888889	9	9	9	FALSE	TGFBR1	12.666666666666666	0	9	0	0.923305785123967	FALSE	0	TGFBR1	1056	0.2345679012345679
143	3.115702479338843	0.017923312468240016	0.3209549071618037	0.3333333333333333	9	9	8	FALSE	CD27	9.666666666666666	0	9	0	0.9153719008264463	FALSE	0	CD27	1008	0.23015873015873015
147	2.8512396694214877	0.03968288698208263	0.3507246376811594	0.3055555555555556	9	9	9	FALSE	RPS6KB1	12.222222222222221	0	9	0	0.9259504132231404	FALSE	0	RPS6KB1	2008	0.20689655172413793
155	2.84297520661157	0.03077022166691587	0.35174418604651164	0.5	9	9	9	FALSE	CHUK	14.88888888888889	0	9	0	0.9262809917355372	FALSE	0	CHUK	1784	0.2462962962962963
175	3.0165289256198347	0.185128358142791	0.3315068493150685	0.3055555555555556	9	9	7	FALSE	ITGA4	9.222222222222221	0	9	0	0.9193388429752066	FALSE	0	ITGA4	7556	0.21951219512195122
180	3.1487603305785123	0.07487579174274023	0.31758530183727035	0.1388888888888889	9	9	10	FALSE	RB1	6.555555555555555	0	9	0	0.9140495867768595	FALSE	0	RB1	3134	0.14728682170542637
184	3.090909090909091	0.04225292448327547	0.3235294117647059	0.19444444444444445	9	9	8	FALSE	ITGAV	8.777777777777779	0	9	0	0.9163636363636364	FALSE	0	ITGAV	2482	0.22822822822822822
115	3.1074380165289255	0.02536375341712102	0.3218085106382979	0.21428571428571427	8	8	9	FALSE	GSTP1	10.375	0	8	0	0.9157024793388431	FALSE	0	GSTP1	1634	0.22282608695652173
171	3.1074380165289255	0.020633163933661054	0.3218085106382979	0.21428571428571427	8	8	9	FALSE	ENO1	8	0	8	0	0.9157024793388431	FALSE	0	ENO1	942	0.18313953488372092
181	3.231404958677686	0.035904248688072994	0.309462915601023	0.17857142857142858	8	8	10	FALSE	PPIG	7.875	0	8	0	0.9107438016528926	FALSE	0	PPIG	2212	0.20065789473684212
140	3.1404958677685952	0.02498845374698385	0.31842105263157894	0.3333333333333333	7	7	9	FALSE	PDCD4	11	0	7	0	0.9143801652892561	FALSE	0	PDCD4	1584	0.26785714285714285
142	2.9421487603305785	0.004427013538374283	0.3398876404494382	0.6666666666666666	7	7	9	FALSE	BMP7	14.571428571428571	0	7	0	0.9223140495867769	FALSE	0	BMP7	466	0.2802197802197802
158	3.347107438016529	0.04979906704603395	0.29876543209876544	0.14285714285714285	7	7	10	FALSE	TFAM	8	0	7	0	0.9061157024793388	FALSE	0	TFAM	2876	0.22510822510822512
176	3.272727272727273	0.010631197902957731	0.3055555555555555	0.2857142857142857	7	7	8	FALSE	CD58	7.571428571428571	0	7	0	0.9090909090909091	FALSE	0	CD58	520	0.2602040816326531
100	3.231404958677686	0.02851577893588911	0.309462915601023	0.2	6	6	9	FALSE	MYBL2	7.5	0	6	0	0.9107438016528926	FALSE	0	MYBL2	1218	0.21875
108	3.5702479338842976	0.034574751559094515	0.28009259259259256	0.13333333333333333	6	6	10	FALSE	SMC4	5	0	6	0	0.8971900826446282	FALSE	0	SMC4	1420	0.21212121212121213
114	3.3388429752066116	0.050334096573765995	0.2995049504950495	0.26666666666666666	6	6	10	FALSE	COPS5	8.166666666666666	0	6	0	0.9064462809917356	FALSE	0	COPS5	2672	0.24019607843137256
130	3.28099173553719	0.045653191224411416	0.3047858942065491	0.13333333333333333	6	6	10	FALSE	USP1	7.166666666666667	0	6	0	0.9087603305785125	FALSE	0	USP1	1854	0.20833333333333334
141	3.12396694214876	5.145611963793782E-4	0.3201058201058201	0.7333333333333333	6	6	9	FALSE	TIMP1	16.166666666666668	0	6	0	0.9150413223140496	FALSE	0	TIMP1	40	0.375968992248062
145	3.2148760330578514	0.001763587499124689	0.31105398457583544	0.6	6	6	9	FALSE	BIRC2	12.5	0	6	0	0.9114049586776859	FALSE	0	BIRC2	192	0.33783783783783783
150	3.87603305785124	0.058140260412987664	0.2579957356076759	0.06666666666666667	6	6	11	FALSE	SMARCA5	3.8333333333333335	0	6	0	0.8849586776859505	FALSE	0	SMARCA5	2812	0.19791666666666666
98	3.5702479338842976	0.03696957132786009	0.28009259259259256	0.1	5	5	9	FALSE	ECT2	4.6	0	5	0	0.8971900826446282	FALSE	0	ECT2	1628	0.25
128	3.355371900826446	0.0350783576610289	0.29802955665024633	0.1	5	5	9	FALSE	CD79A	8.2	0	5	0	0.9057851239669421	FALSE	0	CD79A	1262	0.25333333333333335
135	3.7355371900826446	0.017983418758327298	0.2676991150442478	0.1	5	5	9	FALSE	TIA1	6.2	0	5	0	0.8905785123966942	FALSE	0	TIA1	1366	0.2545454545454545
139	3.3801652892561984	6.731273776728321E-4	0.29584352078239606	0.6	5	5	9	FALSE	SKIL	11.6	0	5	0	0.9047933884297521	FALSE	0	SKIL	40	0.4
146	3.2975206611570247	0.009820438657574844	0.3032581453634085	0.6	5	5	9	FALSE	PMAIP1	12.2	0	5	0	0.908099173553719	FALSE	0	PMAIP1	644	0.36363636363636365
178	3.1735537190082646	0.006501659100958203	0.3151041666666667	0.5	5	5	8	FALSE	ALCAM	13.4	0	5	0	0.9130578512396694	FALSE	0	ALCAM	414	0.3435897435897436
80	3.15702479338843	0.021180888949875246	0.31675392670157065	0.16666666666666666	4	4	9	FALSE	MYOD1	11.5	0	4	0	0.9137190082644628	FALSE	0	MYOD1	1036	0.2972972972972973
94	3.4049586776859506	0.023154495234385033	0.2936893203883495	0.16666666666666666	4	4	10	FALSE	EIF5A	9	0	4	0	0.903801652892562	FALSE	0	EIF5A	844	0.29310344827586204
110	3.272727272727273	0.010885279685474146	0.3055555555555555	0.3333333333333333	4	4	9	FALSE	UCHL5	11.5	0	4	0	0.9090909090909091	FALSE	0	UCHL5	800	0.359375
119	4.371900826446281	0.03314967860422405	0.22873345935727787	0	4	4	11	FALSE	POC1B	2	0	4	0	0.8651239669421487	FALSE	0	POC1B	2138	0.3333333333333333
129	3.652892561983471	7.500327954873408E-4	0.2737556561085973	0.5	4	4	9	FALSE	CD226	9.75	0	4	0	0.8938842975206611	FALSE	0	CD226	68	0.41304347826086957
132	3.231404958677686	0.0025309529246735135	0.309462915601023	0.3333333333333333	4	4	9	FALSE	KLK3	14.25	0	4	0	0.9107438016528926	FALSE	0	KLK3	196	0.3684210526315789
165	3.190082644628099	0.003730901453607765	0.3134715025906736	0.3333333333333333	4	4	9	FALSE	ARHGDIA	13.25	0	4	0	0.912396694214876	FALSE	0	ARHGDIA	286	0.33974358974358976
189	8.314049586776859	0.016528925619834708	0.12027833001988072	0.5	4	4	12	FALSE	SCD	3	0	4	0	0.7074380165289256	FALSE	0	SCD	628	0.55
190	7.363636363636363	0.07988980716253442	0.13580246913580246	0.5	4	4	11	FALSE	ACSL3	3.25	0	4	0	0.7454545454545455	FALSE	0	ACSL3	3100	0.5
193	8.314049586776859	0.016528925619834708	0.12027833001988072	0.5	4	4	12	FALSE	ACACB	3	0	4	0	0.7074380165289256	FALSE	0	ACACB	628	0.55
75	4.68595041322314	0.1399449035812672	0.21340388007054675	0	3	3	8	FALSE	SGSM2	1.6666666666666667	0	3	0	0.8525619834710745	FALSE	0	SGSM2	5524	0.3333333333333333
79	4.12396694214876	0.0026564344746162925	0.24248496993987978	0	3	3	10	FALSE	RRM2B	4.666666666666667	0	3	0	0.8750413223140495	FALSE	0	RRM2B	92	0.4074074074074074
91	3.446280991735537	0.016528925619834708	0.2901678657074341	0.3333333333333333	3	3	10	FALSE	ERP29	11.333333333333334	0	3	0	0.9021487603305784	FALSE	0	ERP29	596	0.39285714285714285
96	3.3388429752066116	0.012497063862576121	0.2995049504950495	0.3333333333333333	3	3	10	FALSE	MASTL	12	0	3	0	0.9064462809917356	FALSE	0	MASTL	790	0.3763440860215054
99	3.87603305785124	0	0.2579957356076759	1	3	3	10	FALSE	E2F4	6	0	3	0	0.8849586776859505	FALSE	0	E2F4	0	0.5
101	3.87603305785124	0	0.2579957356076759	1	3	3	10	FALSE	E2F2	6	0	3	0	0.8849586776859505	FALSE	0	E2F2	0	0.5
102	3.43801652892562	6.755870392234028E-4	0.2908653846153846	0.6666666666666666	3	3	10	FALSE	DNAJB4	12	0	3	0	0.9024793388429753	FALSE	0	DNAJB4	28	0.4
112	4.305785123966942	0.016528925619834708	0.23224568138195778	0.3333333333333333	3	3	11	FALSE	RNF139	3	0	3	0	0.8677685950413223	FALSE	0	RNF139	864	0.4444444444444444
118	3.446280991735537	0.04000953591862681	0.2901678657074341	0	3	3	10	FALSE	CETN3	10	0	3	0	0.9021487603305784	FALSE	0	CETN3	2104	0.34615384615384615
122	3.925619834710744	0.018191164895710345	0.25473684210526315	0	3	3	11	FALSE	CEBPZ	5.333333333333333	0	3	0	0.8829752066115703	FALSE	0	CEBPZ	968	0.3333333333333333
123	3.5289256198347108	0.031910976229158054	0.28337236533957844	0	3	3	10	FALSE	EHMT2	7	0	3	0	0.8988429752066116	FALSE	0	EHMT2	1494	0.3333333333333333
127	3.4132231404958677	0.016528925619834708	0.2929782082324455	0.3333333333333333	3	3	9	FALSE	RORC	11.666666666666666	0	3	0	0.9034710743801654	FALSE	0	RORC	490	0.40476190476190477
136	4.016528925619835	0.003996864566653007	0.24897119341563784	0.3333333333333333	3	3	10	FALSE	MBNL1	3.6666666666666665	0	3	0	0.8793388429752066	FALSE	0	MBNL1	286	0.4166666666666667
152	3.487603305785124	0.016528925619834708	0.28672985781990523	0.3333333333333333	3	3	10	FALSE	HSPA13	9.666666666666666	0	3	0	0.900495867768595	FALSE	0	HSPA13	554	0.37333333333333335
154	3.355371900826446	0.003602862549143541	0.29802955665024633	0.3333333333333333	3	3	10	FALSE	ATF2	12.333333333333334	0	3	0	0.9057851239669421	FALSE	0	ATF2	130	0.36363636363636365
157	3.677685950413223	0.003995146267873541	0.27191011235955054	0	3	3	10	FALSE	ATF1	4.666666666666667	0	3	0	0.892892561983471	FALSE	0	ATF1	228	0.36666666666666664
163	3.4958677685950414	7.473616268082671E-4	0.28605200945626474	0.3333333333333333	3	3	9	FALSE	WAS	8	0	3	0	0.9001652892561984	FALSE	0	WAS	62	0.42592592592592593
166	3.446280991735537	0.02878178855022484	0.2901678657074341	0	3	3	10	FALSE	TRIM23	10.333333333333334	0	3	0	0.9021487603305784	FALSE	0	TRIM23	1970	0.358974358974359
170	3.4132231404958677	0.016528925619834708	0.2929782082324455	0.3333333333333333	3	3	10	FALSE	ANXA3	14.333333333333334	0	3	0	0.9034710743801654	FALSE	0	ANXA3	608	0.4375
172	3.3884297520661155	0.001874086274912721	0.29512195121951224	0.3333333333333333	3	3	10	FALSE	PYGB	12	0	3	0	0.9044628099173554	FALSE	0	PYGB	112	0.3763440860215054
173	3.4545454545454546	9.228650137741052E-4	0.2894736842105263	0.6666666666666666	3	3	10	FALSE	ALDOA	12	0	3	0	0.9018181818181819	FALSE	0	ALDOA	52	0.42857142857142855
182	3.272727272727273	0.007631796256198165	0.3055555555555555	0.3333333333333333	3	3	10	FALSE	AHR	14	0	3	0	0.9090909090909091	FALSE	0	AHR	438	0.37962962962962965
192	8.322314049586776	0	0.1201588877855015	1	3	3	12	FALSE	GPAM	4	0	3	0	0.707107438016529	FALSE	0	GPAM	0	0.6666666666666666
76	5.56198347107438	0.10991735537190081	0.17979197622585438	0	2	2	9	FALSE	RAB2A	2.5	0	2	0	0.8175206611570247	FALSE	0	RAB2A	4312	0.5
78	4.851239669421488	0.016528925619834708	0.2061328790459966	0	2	2	12	FALSE	POLI	3.5	0	2	0	0.8459504132231405	FALSE	0	POLI	848	0.5
81	3.84297520661157	0.15289256198347106	0.2602150537634409	0	2	2	7	FALSE	RAP1B	6	0	2	0	0.8862809917355372	FALSE	0	RAP1B	6100	0.5
89	3.7851239669421486	0.016528925619834708	0.26419213973799127	0	2	2	10	FALSE	ETNK1	5.5	0	2	0	0.888595041322314	FALSE	0	ETNK1	458	0.5
92	3.950413223140496	0.0011019283746556473	0.2531380753138075	0	2	2	10	FALSE	MRPL19	5	0	2	0	0.8819834710743801	FALSE	0	MRPL19	32	0.5
95	4.264462809917355	0.002154882154882154	0.23449612403100775	0	2	2	10	FALSE	PPP1R12A	5.5	0	2	0	0.8694214876033058	FALSE	0	PPP1R12A	176	0.5625
105	3.6611570247933884	0	0.27313769751693	1	2	2	10	FALSE	CYP4A11	12.5	0	2	0	0.8935537190082644	FALSE	0	CYP4A11	0	0.5952380952380952
106	3.56198347107438	0	0.28074245939675174	1	2	2	10	FALSE	NR4A1	15.5	0	2	0	0.8975206611570248	FALSE	0	NR4A1	0	0.7045454545454546
111	4.31404958677686	0	0.2318007662835249	1	2	2	11	FALSE	HM13	4.5	0	2	0	0.8674380165289256	FALSE	0	HM13	0	0.6428571428571429
133	3.239669421487603	0	0.30867346938775514	1	2	2	9	FALSE	CYBA	25	0	2	0	0.9104132231404958	FALSE	0	CYBA	0	0.6944444444444444
137	4.603305785123967	0	0.2172351885098743	1	2	2	10	FALSE	C9orf72	4	0	2	0	0.8558677685950413	FALSE	0	C9orf72	0	0.6666666666666666
148	3.6859504132231407	0	0.2713004484304933	1	2	2	10	FALSE	EPOR	11.5	0	2	0	0.8925619834710744	FALSE	0	EPOR	0	0.7666666666666667
156	4.2727272727272725	7.943067033976124E-4	0.23404255319148937	0	2	2	11	FALSE	GABPA	5	0	2	0	0.869090909090909	FALSE	0	GABPA	18	0.5
160	4.421487603305785	1.377410468319559E-4	0.22616822429906544	0	2	2	11	FALSE	ORC4	2.5	0	2	0	0.8631404958677686	FALSE	0	ORC4	2	0.5
161	3.4958677685950414	0.01396431850977305	0.28605200945626474	0	2	2	10	FALSE	ASPH	13.5	0	2	0	0.9001652892561984	FALSE	0	ASPH	376	0.5
167	4.1570247933884295	8.513203967749424E-4	0.24055666003976145	0	2	2	11	FALSE	AP1AR	5.5	0	2	0	0.8737190082644628	FALSE	0	AP1AR	48	0.5625
186	6.454545454545454	0.09504132231404958	0.15492957746478875	0	2	2	10	FALSE	RAB18	3	0	2	0	0.7818181818181819	FALSE	0	RAB18	3708	0.5
72	4.2727272727272725	0	0.23404255319148937	0	1	1	11	FALSE	USP32	6	0	1	0	0.869090909090909	FALSE	0	USP32	0	0
73	5.677685950413223	0	0.17612809315866085	0	1	1	9	FALSE	TBC1D22B	3	0	1	0	0.812892561983471	FALSE	0	TBC1D22B	0	0
74	9.305785123966942	0	0.10746003552397869	0	1	1	13	FALSE	SC5D	4	0	1	0	0.6677685950413224	FALSE	0	SC5D	0	0
77	5.8429752066115705	0	0.17114568599717114	0	1	1	13	FALSE	POLK	2	0	1	0	0.8062809917355372	FALSE	0	POLK	0	0
82	4.008264462809917	0	0.24948453608247423	0	1	1	8	FALSE	ST8SIA4	9	0	1	0	0.8796694214876033	FALSE	0	ST8SIA4	0	0
83	4.404958677685951	0	0.2270168855534709	0	1	1	10	FALSE	IKZF2	3	0	1	0	0.8638016528925619	FALSE	0	IKZF2	0	0
84	4.132231404958677	0	0.24200000000000002	0	1	1	10	FALSE	IBTK	7	0	1	0	0.8747107438016529	FALSE	0	IBTK	0	0
85	3.7107438016528924	0	0.26948775055679286	0	1	1	10	FALSE	HPGD	17	0	1	0	0.8915702479338843	FALSE	0	HPGD	0	0
86	3.84297520661157	0	0.2602150537634409	0	1	1	10	FALSE	HIPK4	9	0	1	0	0.8862809917355372	FALSE	0	HIPK4	0	0
87	3.8925619834710745	0	0.25690021231422505	0	1	1	9	FALSE	UGDH	14	0	1	0	0.884297520661157	FALSE	0	UGDH	0	0
88	4.776859504132231	0	0.20934256055363323	0	1	1	11	FALSE	GPCPD1	2	0	1	0	0.8489256198347107	FALSE	0	GPCPD1	0	0
90	4.43801652892562	0	0.22532588454376162	0	1	1	11	FALSE	TMX3	3	0	1	0	0.8624793388429752	FALSE	0	TMX3	0	0
93	4.396694214876033	0	0.22744360902255642	0	1	1	11	FALSE	SMOX	4	0	1	0	0.8641322314049588	FALSE	0	SMOX	0	0
97	4.56198347107438	0	0.21920289855072464	0	1	1	10	FALSE	KIF21A	5	0	1	0	0.8575206611570247	FALSE	0	KIF21A	0	0
103	3.512396694214876	0	0.2847058823529412	0	1	1	10	FALSE	DNAAF2	25	0	1	0	0.899504132231405	FALSE	0	DNAAF2	0	0
104	5.297520661157025	0	0.18876755070202808	0	1	1	12	FALSE	DERL3	3	0	1	0	0.8280991735537191	FALSE	0	DERL3	0	0
107	5.363636363636363	0	0.1864406779661017	0	1	1	12	FALSE	CSPP1	4	0	1	0	0.8254545454545454	FALSE	0	CSPP1	0	0
109	4.56198347107438	0	0.21920289855072464	0	1	1	11	FALSE	CSNK2B	6	0	1	0	0.8575206611570247	FALSE	0	CSNK2B	0	0
113	3.7768595041322315	0	0.2647702407002188	0	1	1	9	FALSE	CNN2	11	0	1	0	0.8889256198347106	FALSE	0	CNN2	0	0
116	4.099173553719008	0	0.24395161290322584	0	1	1	10	FALSE	CHAC2	8	0	1	0	0.8760330578512396	FALSE	0	CHAC2	0	0
117	4.43801652892562	0	0.22532588454376162	0	1	1	11	FALSE	HAUS1	3	0	1	0	0.8624793388429752	FALSE	0	HAUS1	0	0
120	5.363636363636363	0	0.1864406779661017	0	1	1	12	FALSE	CEP44	4	0	1	0	0.8254545454545454	FALSE	0	CEP44	0	0
121	4.917355371900826	0	0.20336134453781513	0	1	1	12	FALSE	TMA16	3	0	1	0	0.843305785123967	FALSE	0	TMA16	0	0
124	4.520661157024794	0	0.22120658135283364	0	1	1	11	FALSE	CDK8	3	0	1	0	0.8591735537190083	FALSE	0	CDK8	0	0
125	4.347107438016529	0	0.2300380228136882	0	1	1	10	FALSE	DYRK2	5	0	1	0	0.8661157024793389	FALSE	0	DYRK2	0	0
126	4.347107438016529	0	0.2300380228136882	0	1	1	10	FALSE	CEACAM19	5	0	1	0	0.8661157024793389	FALSE	0	CEACAM19	0	0
131	4.2727272727272725	0	0.23404255319148937	0	1	1	11	FALSE	CASP8AP2	6	0	1	0	0.869090909090909	FALSE	0	CASP8AP2	0	0
134	3.520661157024793	0	0.284037558685446	0	1	1	10	FALSE	CAPNS1	25	0	1	0	0.8991735537190082	FALSE	0	CAPNS1	0	0
151	4.867768595041323	0	0.2054329371816638	0	1	1	12	FALSE	BAZ2B	6	0	1	0	0.845289256198347	FALSE	0	BAZ2B	0	0
153	4.479338842975206	0	0.22324723247232472	0	1	1	11	FALSE	BAG4	3	0	1	0	0.8608264462809917	FALSE	0	BAG4	0	0
159	4.338842975206612	0	0.23047619047619045	0	1	1	11	FALSE	ATAD3A	7	0	1	0	0.8664462809917356	FALSE	0	ATAD3A	0	0
169	4.404958677685951	0	0.2270168855534709	0	1	1	11	FALSE	GCA	3	0	1	0	0.8638016528925619	FALSE	0	GCA	0	0
183	4.082644628099174	0	0.2449392712550607	0	1	1	9	FALSE	ADAM9	9	0	1	0	0.876694214876033	FALSE	0	ADAM9	0	0
185	4.082644628099174	0	0.2449392712550607	0	1	1	9	FALSE	ADAM15	9	0	1	0	0.876694214876033	FALSE	0	ADAM15	0	0
188	3.7024793388429753	0	0.2700892857142857	0	1	1	10	FALSE	ACKR3	14	0	1	0	0.8919008264462809	FALSE	0	ACKR3	0	0
191	9.305785123966942	0	0.10746003552397869	0	1	1	13	FALSE	MTHFD2	4	0	1	0	0.6677685950413224	FALSE	0	MTHFD2	0	0

## Sheet: Figure 4B
	GO-BP enrichment analysis was conducted to investigate the potential mechanisms of TMYXP blood components in the treatment of elderly CHD patients.
		128 up-regulated DEGs
ONTOLOGY	ID	Description	GeneRatio	BgRatio	pvalue	p.adjust	qvalue	geneID	Count
BP	GO:0034612	Response to tumor necrosis factor	11/122	249/18800	6.78802e-07	0.00161962	0.0014755	PTGS2/CXCL8/CASP3/BAG4/FAS/BIRC2/JAK2/RPS6KB1/ADAM9/CD58/CHUK	11
BP	GO:2001233	Regulation of apoptotic signaling pathway	12/122	370/18800	5.25344e-06	0.00417823	0.00380644	PMAIP1/ITGAV/PTGS2/RB1/HMGB2/SKIL/TGFBR1/RRM2B/FAS/JAK2/RPS6KB1/ACKR3	12
BP	GO:0002260	Lymphocyte homeostasis	5/122	65/18800	6.41318e-05	0.0306037	0.0278805	PMAIP1/CASP3/SKIL/FAS/GPAM	5
BP	GO:0048872	Homeostasis of number of cells	9/122	282/18800	9.40829e-05	0.0342711	0.0312215	PMAIP1/RB1/HMGB2/CASP3/SKIL/FLVCR1/FAS/GPAM/JAK2	9
BP	GO:2000116	Regulation of cysteine-type endopeptidase activity	8/122	229/18800	0.000125446	0.0342711	0.0312215	PMAIP1/PTGS2/CASP8AP2/ASPH/FAS/BIRC2/TNFAIP8/JAK2	8
BP	GO:0051384	Response to glucocorticoid	6/122	139/18800	0.000293516	0.0597052	0.0543924	PTGS2/CASP3/ANXA3/JAK2/RPS6KB1/ADAM9	6
BP	GO:0062197	Cellular response to chemical stress	9/122	332/18800	0.000318222	0.0597052	0.0543924	PTGS2/CPEB2/ATF2/CASP3/ECT2/FAS/STAU2/JAK2/CHUK	9
BP	GO:0032496	Response to lipopolysaccharide	9/122	333/18800	0.000325301	0.0597052	0.0543924	PTGS2/CXCL8/HMGB2/CASP3/PDCD4/JAK2/RPS6KB1/ADAM9/HPGD	9
BP	GO:0006260	DNA replication	8/122	280/18800	0.000487556	0.0696825	0.0634819	ATF1/POLK/SMARCA5/RRM2B/UCHL5/ORC4/RECQL/POLI	8
BP	GO:0006979	Response to oxidative stress	10/122	433/18800	0.000525686	0.0696825	0.0634819	PTGS2/CPEB2/ATF2/CASP3/ECT2/RRM2B/STAU2/JAK2/ADAM9/CHUK	10
		66 down-regulated DEGs
ONTOLOGY	ID	Description	GeneRatio	BgRatio	pvalue	p.adjust	qvalue	geneID	Count
BP	GO:0045445	Myoblast differentiation	4/64	81/18800	0.000166931	0.0593261	0.0507208	MYOD1/WNT10B/PLCB1/TGFB1	4
BP	GO:2000146	Negative regulation of cell motility	7/64	361/18800	0.000220328	0.0593261	0.0507208	TIMP1/CNN2/WAS/PLCB1/TGFB1/ADAM15/CSNK2B	7
BP	GO:0042307	Positive regulation of protein import into nucleus	3/64	39/18800	0.000315056	0.0649136	0.0554978	TGFB1/FLNA/HSP90AB1	3
BP	GO:0042554	Superoxide anion generation	3/64	43/18800	0.000421334	0.0649136	0.0554978	TGFB1/GSTP1/CYBA	3
BP	GO:0009410	Response to xenobiotic stimulus	7/64	411/18800	0.000481749	0.0649136	0.0554978	RORC/EHMT2/SMOX/GSTP1/HSP90AB1/CYBA/ACACB	7
BP	GO:1900426	Positive regulation of defense response to bacterium	2/64	13/18800	0.000868599	0.0964063	0.0824224	KLK3/CYBA	2
BP	GO:0006754	ATP biosynthetic process	3/64	57/18800	0.000965647	0.0964063	0.0824224	ALDOA/TGFB1/ENO1	3
BP	GO:0033619	Membrane protein proteolysis	3/64	58/18800	0.00101586	0.0964063	0.0824224	TIMP1/HM13/TGFB1	3
BP	GO:0030336	Negative regulation of cell migration	6/64	346/18800	0.00113658	0.0964063	0.0824224	TIMP1/CNN2/PLCB1/TGFB1/ADAM15/CSNK2B	6
BP	GO:0045444	Fat cell differentiation	5/64	237/18800	0.00127075	0.099807	0.0853299	RORC/WNT10B/PLCB1/TGFB1/NR4A1	5

## Sheet: Figure 4C,D
			Figure 4C
GO:0034612	GO:2001233	GO:0002260	GO:0048872	GO:2000116	GO:0051384	GO:0062197	GO:0032496	GO:0006979	GO:0045445	GO:2000146	GO:0042307	GO:0042554	GO:0009410	GO:0006754	GO:0033619	GO:0030336	GO:0045444
response to tumor necrosis factor	regulation of apoptotic signaling pathway	lymphocyte homeostasis	homeostasis of number of cells	regulation of cysteine-type endopeptidase activity	response to glucocorticoid	cellular response to chemical stress	response to lipopolysaccharide	response to oxidative stress	myoblast differentiation	negative regulation of cell motility	positive regulation of protein import into nucleus	superoxide anion generation	response to xenobiotic stimulus	ATP biosynthetic process	membrane protein proteolysis	negative regulation of cell migration	fat cell differentiation
CASP3	PTGS2	CASP3	CASP3	PTGS2	CASP3	CASP3	CASP3	CASP3	TGFB1	TGFB1	HSP90AB1	TGFB1	HSP90AB1	TGFB1	TGFB1	TGFB1	TGFB1
PTGS2	FAS	FAS	FAS	FAS	PTGS2	PTGS2	PTGS2	PTGS2			TGFB1	GSTP1	GSTP1	ENO1
FAS	JAK2		JAK2	JAK2	JAK2	FAS	CXCL8	JAK2			FLNA
CXCL8	ITGAV		RB1		RPS6KB1	JAK2	JAK2	CHUK
JAK2	TGFBR1					CHUK	RPS6KB1
CHUK	RPS6KB1
RPS6KB1	RB1
	Figure 4D
Blood components	# hub genes
Genistein	17
Emodin	7
Isoliquiritigenin	5
Glycyrrhizic acid	5
Gallic acid	5
Verbascoside	5
Calycosin	4
Rhein	4
Formononetin	2
Ephedrine	1
	Genistein	Emodin	Isoliquiritigenin	Glycyrrhizic acid	Gallic acid	Verbascoside	Calycosin	Rhein	Formononetin	Ephedrine
	HSP90AB1	TGFB1	TGFB1	TGFB1	TGFB1	TGFB1	TGFB1	HSP90AB1	CASP3	CASP3
	TGFB1	CASP3	CASP3	CASP3	CASP3	PTGS2	CASP3	TGFB1	CXCL8
	CASP3	FAS	PTGS2	PTGS2	PTGS2	CXCL8	CXCL8	CASP3
	PTGS2	CXCL8	BCL2L1	CXCL8	CXCL8	TGFBR1	TFAM	PTGS2
	FAS	JAK2	CHUK	TGFBR1	CHUK	RB1
	CXCL8	RB1
	BCL2L1	GSTP1
	FLNA
	JAK2
	CD27									# node1	# node2		# node1	# node2	CCC
	ITGAV									HSP90AB1	Genistein		Genistein	Genistein	1
	ITGA4									TGFB1	Genistein		Emodin	Emodin	1
	RPS6KB1									CASP3	Genistein		Isoliquiritigenin	Isoliquiritigenin	1
	RB1									PTGS2	Genistein		Glycyrrhizic acid	Glycyrrhizic acid	1
	ENO1									FAS	Genistein		Gallic acid	Gallic acid	1
	GSTP1									CXCL8	Genistein		Verbascoside	Verbascoside	1
	PPIG									BCL2L1	Genistein		Calycosin	Calycosin	1
										FLNA	Genistein		Rhein	Rhein	1
										JAK2	Genistein		Formononetin	Formononetin	1
										CD27	Genistein		Ephedrine	Ephedrine	1
										ITGAV	Genistein
										ITGA4	Genistein
										RPS6KB1	Genistein
										RB1	Genistein
										ENO1	Genistein
										GSTP1	Genistein
										PPIG	Genistein
										TGFB1	Emodin
										CASP3	Emodin
										FAS	Emodin
										CXCL8	Emodin
										JAK2	Emodin
										RB1	Emodin
										GSTP1	Emodin
										TGFB1	Isoliquiritigenin
										CASP3	Isoliquiritigenin
										PTGS2	Isoliquiritigenin
										BCL2L1	Isoliquiritigenin
										CHUK	Isoliquiritigenin
										TGFB1	Glycyrrhizic acid
										CASP3	Glycyrrhizic acid
										PTGS2	Glycyrrhizic acid
										CXCL8	Glycyrrhizic acid
										TGFBR1	Glycyrrhizic acid
										TGFB1	Gallic acid
										CASP3	Gallic acid
										PTGS2	Gallic acid
										CXCL8	Gallic acid
										CHUK	Gallic acid
										TGFB1	Verbascoside
										PTGS2	Verbascoside
										CXCL8	Verbascoside
										TGFBR1	Verbascoside
										RB1	Verbascoside
										TGFB1	Calycosin
										CASP3	Calycosin
										CXCL8	Calycosin
										TFAM	Calycosin
										HSP90AB1	Rhein
										TGFB1	Rhein
										CASP3	Rhein
										PTGS2	Rhein
										CASP3	Formononetin
										CXCL8	Formononetin
										CASP3	Ephedrine

## Sheet: Figure 5A
	Molecular docking scores less than -4 kcal/mol (Fig. 5A)
	Protein name	Blood Components	kcal/mol
	CASP3	Calycosin	-4
	JAK2	Emodin	-6.56
	GSTP1	Emodin	-4.84
	CASP3	Emodin	-4.55
	FAS	Emodin	-4.47
	PTGS2	Gallic acid	-5.51
	CASP3	Gallic acid	-4.24
	PTGS2	Genistein	-6.36
	RPS6KB1	Genistein	-6.23
	JAK2	Genistein	-6.2
	ITGA4	Genistein	-5.58
	HSP90AB1	Genistein	-5.19
	GSTP1	Genistein	-4.9
	ITGAV	Genistein	-4.35
	FAS	Genistein	-4.34
	TGFB1	Genistein	-4.33
	CASP3	Genistein	-4.14
	PTGS2	Glycyrrhizic acid	-9.42
	TGFBR1	Glycyrrhizic acid	-4.71
	TGFB1	Glycyrrhizic acid	-4.49
	PTGS2	Isoliquiritigenin	-6.19
	CASP3	Isoliquiritigenin	-4.93
	BCL2L1	Isoliquiritigenin	-4.18
	PTGS2	Rhein	-6.95
	HSP90AB1	Rhein	-5.7
	CASP3	Rhein	-4.87
	TGFB1	Rhein	-4.01
	PTGS2	Verbascoside	-9.87
	TGFBR1	Verbascoside	-7.81
	TGFB1	Verbascoside	-5.85
	Molecular docking was performed using LeDock software.

[truncated: 2 more sheets: Figure 6A, Figure 7]
